# Supplementary material for: Holocene ostracod assemblages from the Co To Islands, northeastern Vietnam
Source: Copernicus journal article supplement (doi:10.5194/jm-38-97-2019), 2019-06-18
Supplement: Supplementary file 1 [file jm-38-97-2019-supplement.pdf]

Supplement of J. Micropalaeontol., 38, 97–111, 2019  
<https://doi.org/10.5194/jm-38-97-2019-supplement>  
© Author(s) 2019. This work is distributed under  
the Creative Commons Attribution 4.0 License.

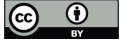

*Supplement of*

## **Holocene ostracod assemblages from the Co To Islands, northeastern Vietnam**

**Sota Niiyama et al.**

*Correspondence to:* Sota Niiyama (niiyama@stu.kanazawa-u.ac.jp)

The copyright of individual parts of the supplement might differ from the CC BY 4.0 License.

## Synonym list

Class **OSTRACODA** Latreille, 1802

Order **PODOCOPIDA** Sars, 1866

Suborder **Podocopina** Sars, 1866

5 Family **Bairdiidae** Sars, 1866

Genus *Neonesidea* Maddocks, 1969

*Neonesidea elegans* s.l. (Brady, 1869)

Figure. 3 (1)

10 1869 *Bairdia elegans* Brady: 156, pl. 16, figs. 11, 12.

1869 *Bairdia subdeltoidea* (Münster); Brady: 155.

?1978 *Bairdia haikangensis* Guan in Hubei Institute of Geology and Science: 155, fig. 17; pl. 38. figs. 8-11.

?1981 *Bairdia haikangensis* Guan; Gou et al.: 148, pl. 74. figs. 1-4.

?1983 *Bairdia haikangensis* Guan; Gou et al.: 14, pl.1. figs. 1-9.

15 ?1985 *Neonesidea haikangensis* (Guan); Wang and Zhao: 82, fig. 16; pl. 6. figs. 4, 5.

?1985 *Neonesidea haikangensis* (Guan); Zhao et al.: 204, fig. 21; pl. 19. figs. 3, 4.

1986 *Neonesidea haikangensis* (Guan); Zhao et al.: pl. 2, figs. 5, 6.

1987 *Bairdia haikangensis* Guan; Cai and Chen: pl. 2, fig. 7.

1987 *Neonesidea haikangensis* (Guan); Wang Q. and Zhang: 290, pl. 1, figs. 2, 3.

20 1987a *Neonesidea elegans* (Brady); Whatley and Zhao: 24, pl. 1, figs. 3-7

1988 *Neonesidea haikangensis* (Guan); Ruan and Hao: pl. 34, figs. 3-7.

1989 *Bairdia haikangensis* Guan; Gou and Gong: pl. 164, fig. 1.

1990 *Neonesidea elegans* (Brady); Zhao and Wang: pl. 2, fig. 11.

2008 *Neonesidea haikangensis* (Guan); Hu and Tao: pl. 172, figs. 4, 5, 7, 8, 10-12; pl. 183, figs. 9, 12.

25 2011 *Neonesidea elegans* (Brady); Iwatani et al.: 280, fig. 5.4.

Family **Pontocyprididae** Müller, 1894

Genus *Propontocypris* Sylvester-Bradley, 1947

*Propontocypris crocata* Maddocks, 1969

30 Figure. 3 (4)

1969 *Propontocypris crocata* Maddocks: 11, text-figs. 11B, D-F, I-M.

- 1988 *Propontocypris crocata* Maddocks; Ruan and Hao: 245, pl. 36, figs. 7-11.  
 1988 *Propontocypris* cf. *crocata* Maddocks; Ruan and Hao: 346, pl. 36, fig. 12.  
 1988 *Propontocypris quasicrocata* Maddocks; Ruan and Hao: 246, pl. 36, figs. 3-6.  
 ?2002 *Propontocypris crocata* Maddocks; Sridhar et al.: 35, pl. 4, fig. 13.  
 5 ?2008 *Propontocypris crocata* Maddocks; Hu and Tao: pl. 98, fig. 18; pl. 184, figs. 3, 4.  
 non  
 2008 *Propontocypris crocata*; Hu and Tao: pl. 126, figs. 10, 14.

Family **Cushmanideidae** Puri, 1974 in Hartmann and Puri, 1974

Genus *Pontocythere* Dubovsky, 1939

*Pontocythere miurensis* (Hanai, 1959a)

Figure. 3 (6)

- 1959a *Cushmanidea miurensis* Hanai: 302, text-figs. 1a, 1b; pl. 16, figs. 7-10.  
 15 1961 *Cushmanidea miurensis* Hanai; Hanai: 360, text-fig. 4A; figs. 1a, 1b.  
 1968 *Cushmanidea miurensis* Hanai; Ishizaki: pl. 5, figs. 7, 8.  
 1971 *Cushmanidea miurensis* Hanai; Ishizaki: pl. 2, fig. 15.  
 1977a *Cushmanidea miurensis* Hanai; Hu: 87, pl. 3, fig. 22.  
 1978 *Cushmanidea lenis* Guan; Hubei Institute of Geology and Science: pl. 66, figs. 1-4.  
 20 1981 *Cushmanidea miurensis* Hanai; Gou et al.: pl. 79, fig. 5.  
 1982 *Cushmanidea miurensis* Hanai; Cai: pl. 4, figs. 32, 33.  
 1983 *Cushmanidea miurensis* Hanai; Gou et al.: pl. 6, figs. 25-32; pl.7, figs. 1-6.  
 1985 *Pontocythere miurensis* (Hanai); Ikeya et al.: pl. 2, fig. 6.  
 1986 *Pontocythere miurensis* (Hanai); Cheong et al.: 44, pl. 1, fig. 4.  
 25 1986 *Pontocythere miurensis* (Hanai); Hu: 106, pl. 5, figs. 9, 17.  
 1986 *Pontocythere subjaponica* (Hanai); Hu: 108, pl. 5, fig. 15.  
 1987 *Cushmanidea subjaponica* Hanai; Wang Q. and Zhang: 290, pl. 1, fig. 16.  
 1987 *Cushmanidea miurensis* Hanai; Zheng: pl. 3, figs. 12, 13.  
 1990 *Pontocythere miurensis* (Hanai); Takayasu et al.: 145, pl. fig. 1.  
 30 1992 *Cushmanidea subjaponica* Hanai; Ikeya and Suzuki: 133, pl. 7, fig. 9.  
 1994 *Cushmanidea subjaponica* Hanai; Zheng: pl. 48, figs. 15-18.  
 1998 *Pontocythere miurensis* (Hanai); Yamane: 55, pl. 10, fig. 1.  
 2000 *Pontocythere miurensis* (Hanai); Irizuki and Hosoyama: 12, fig. 3.1.  
 2001 *Pontocythere miurensis* (Hanai); Yasuhara and Irizuki: 89, pl. 9, figs. 17, 18.

- 2002 *Pontocythere miurensis* (Hanai); Nakao and Tsukagoshi: 77, fig. 5, A-D.
- 2004 *Pontocythere miurensis* (Hanai); Tanaka et al.: 60, pl. 1, fig. 3.
- 2005 *Pontocythere miurensis* (Hanai); Irizuki et al.: 41, fig. 3.4.
- 2007 *Sinopontocythere miurensis* (Hanai); Hou and Gou: pl. 109, figs. 1-4.
- 5 2008 *Pontocythere carpeta* (Hu); Hu and Tao: pl. 23, figs. 5, 9; pl. 42, figs. 1, 2, 4-6, 23; pl. 51, figs. 20, 21; pl. 100, figs. 13, 15, 20; pl. 112, figs. 2, 6; pl. 175, fig. 1; pl. 184, figs. 1, 2, 5; pl. 194, fig. 2; pl. 207, figs. 8, 11.
- 2008 *Pontocythere miurensis* (Hanai); Hu and Tao: pl. 23, fig. 7; pl. 42, fig. 19.
- 2009 *Pontocythere miurensis* (Hanai); Horikoshi et al.: 154, fig. 5.9.
- 2009 *Pontocythere miurensis* (Hanai); Tanaka et al.: 377, pl. 1, fig. 14.
- 10 2016 *Pontocythere miurensis* (Hanai); Matsushima et al.: fig. 6J.
- 2017 *Pontocythere miurensis* (Hanai); Kamiyama et al.: 125, fig. 3G.

non

1977a *Cushmanidea miurensis* Hanai; Hu: 87, pl. 3, figs. 8, 14, 18, 19.

2008 *Pontocythere miurensis* (Hanai); Hu and Tao: pl. 126, figs. 15, 18

15

***Pontocythere subjaponica* (Hanai, 1959a)**

Figure. 3 (7)

- 1959a *Cushmanidea subjaponica* Hanai: pl. 16, figs. 4-6.
- 20 1966 *Cushmanidea subjaponica* Hanai; Ishizaki: 138, pl. 17, fig. 4
- 1968 *Cushmanidea subjaponica* Hanai; Ishizaki: pl. 3, figs. 16, 17.
- 1969 *Cushmanidea subjaponica* Hanai; Ishizaki: pl. 26, fig. 17.
- 1971 *Cushmanidea subjaponica* Hanai; Igo and Ikeya: 203, fig. 12.
- 1971 *Cushmanidea subjaponica* Hanai; Ishizaki: pl. 2, fig. 18.
- 25 1976 *Cushmanidea formosa* Hu: 44, text-fig. 14; pl. 2, figs. 15, 17-21.
- 1977a *Cushmanidea formosa* Hu; Hu: 87, pl. 3, figs. 8, 14, 18, 19.
- 1977 *Cushmanidea subjaponica* Hanai; Okubo: 137, 139, figs. 2a-p, 3a-i.
- 1977a *Cushmanidea subjaponica* Hanai; Herrig: 1167, table 2, figs. 5, 6.
- 1978 *Cushmanidea subjaponica* Hanai; Hubei Institute of Geology and Science: pl. 65, figs. 20-22.
- 30 1978 *Cushmanidea formosa* Hu; Hu and Yeh: pl. 3, figs. 23-26.
- 1979 *Cushmanidea* sp.; Hu: 68, pl. 3, figs. 9, 14.
- 1981 *Cushmanidea subjaponica* Hanai; Gou et al.: pl. 79, figs. 27-29.
- 1982 *Cushmanidea subjaponica* Hanai; Hou et al.: 372, pl. 74, figs. 20-22.
- 1983 *Cushmanidea subjaponica* Hanai; Gou et al.: pl. 7, figs. 14-23.

- 1984 *Cushmanidea formosa* Hu; Hu: 124, pl. 8, figs. 9, 14, 16, 17.
- 1985 *Pontocythere subjaponica* (Hanai); Ikeya et al.: pl. 2, fig. 11.
- 1985 *Pontocythere subjaponica* (Hanai); Ishizaki and Matoba: pl. 6, fig. 2.
- ?1985 *Cushmanidea subjaponica* Hanai; Wang and Bian: 347, pl. 15, fig. 14.
- 5 1985 *Cushmanidea subjaponica* Hanai; Wang and Zhao: 339, pl.7, fig. 3.
- 1985 *Cushmanidea subjaponica* Hanai; Zhao et al.: 351, pl. 19, fig. 10.
- 1986 *Pontocythere subjaponica* (Hanai); Cheong et al.: 44, pl. 1, fig. 5.
- 1987b *Cushmanidea subjaponica* Hanai; Whatley and Zhao: 360, pl. 4, fig. 9.
- 1988 *Cushmanidea japonica* Hanai; Cai: pl. 2, fig. 16.
- 10 1988 *Cushmanidea japonica* Hanai; Ruan and Hao: pl. 43, figs. 18-20.
- 1988 *Cushmanidea japonica* Hanai; Wang et al.: 409, pl. 41, figs. 4, 5.
- 1988 *Pontocythere subjaponica* (Hanai); Yajima: 1076, pl. 1, fig. 8.
- 1988 *Cushmanidea japonica* Hanai; Zhao and Whatley: 165, pl. 1, fig. 6.
- 1989 *Pontocythere subjaponica* (Hanai); Ruan: pl. 1, fig. 8.
- 15 1990 *Pontocythere subjaponica* (Hanai); Tabuki and Nohara: 375, pl. 1, fig. 7.
- 1990 *Pontocythere subjaponica* (Hanai); Takayasu et al.: 145, pl. fig. 2.
- 1990 *Pontocythere subjaponica* (Hanai); Yajima and Lord: 158, figs. 8.10, 8.11.
- 1991 *Pontocythere subjaponica* (Hanai); Ikeya and Itoh: 142, fig. 21A.
- 1992 *Pontocythere subjaponica* (Hanai); Ikeya and Suzuki: 133, pl. 7, fig. 10.
- 20 1992 *Pontocythere subjaponica* (Hanai); Lee and Paik: 147, pl. 1, fig. 13.
- 1992 *Cushmanidea subjaponica* Hanai; Mostafawi: 145, table. 3, fig. 53.
- 1993 *Pontocythere subjaponica* (Hanai); Kamiya and Nakagawa: 123, pl. 1, figs. 7, 8.
- 1995 *Pontocythere subjaponica* (Hanai); Ozawa et al.: 31, pl. 1, fig. 18.
- 1996 *Pontocythere subjaponica* (Hanai); Ozawa: 114, pl. 8, fig. 4.
- 25 1998 *Pontocythere subjaponica* (Hanai); Irizuki et al.: 7, fig. 2.2.
- 1998 *Pontocythere subjaponica* (Hanai); Yamane: 55, pl. 10, fig. 2.
- 2000 *Pontocythere subjaponica* (Hanai); Irizuki and Hosoyama: 12, fig. 3.2.
- 2001 *Pontocythere subjaponica* (Hanai); Kamiya et al.: 103, fig. 18.14.
- 2001 *Pontocythere miurensis* (Hanai); Nakao et al.: 133, fig. 5.10.
- 30 2003 *Pontocythere subjaponica* (Hanai); Yamaguchi: 135, 149, figs. 1S, 10E.
- 2004 *Pontocythere subjaponica* (Hanai); Tanaka et al.: 60, pl. 1, fig. 4.
- 2005 *Pontocythere subjaponica* (Hanai); Ozawa and Kamiya: 258, pl. 1, fig. 2.
- 2007 *Sinopontocythere subjaponica* (Hanai); Hou and Gou: pl. 109, figs. 7-11.
- 2007 *Pontocythere subjaponica* (Hanai); Sasaki et al.: 524, fig. 5.9.

- 2008 *Pontocythere japonica* (Hanai); Hu and Tao: pl. 23, figs. 12, 13; pl. 80, fig. 6; pl. 100, fig. 3; pl. 184, figs. 4, 7.
- 2008 *Pontocythere mera* (Guan); Hu and Tao: pl. 41, fig. 21.
- 2008 *Pontocythere subjaponica* (Hanai); Hu and Tao: pl. 14, figs. 20, 22; pl. 41, figs. 11, 12, 15, 16; pl. 51, figs. 10, 18; pl. 80, figs. 1, 4; pl. 90, fig. 6; pl. 100, figs. 4, 6, 9-12; pl. 111, figs. 15, 21; pl. 112, fig. 5; pl. 133, fig. 5; pl. 137, figs. 8, 12, 16; pl. 157, figs. 18, 19, 21, 22; pl. 207, figs. 7, 14.
- 2008 *Pontocythere subtriangulata* (Hou); Hu and Tao: pl. 32, fig. 4
- 2009 *Pontocythere subjaponica* (Hanai); Horikoshi et al.: 154, fig. 5.10.
- 2009b *Pontocythere subjaponica* (Hanai); Irizuki et al.: 320, fig. 3.1.
- 2009 *Pontocythere subjaponica* (Hanai); Ozawa: 238, fig. 4.17.
- 2009 *Pontocythere subjaponica* (Hanai); Tanaka and Nomura, 62, fig. 4.20.
- 2010 *Pontocythere subjaponica* (Hanai); Ozawa: 35, pl. 4, fig. 2.
- 2011 *Pontocythere subjaponica* (Hanai); Irizuki et al.: 42, fig. 4.2.
- 2012c *Pontocythere subjaponica* (Hanai); Tanaka et al.: 9, fig. 4P.
- 2012 *Pontocythere subjaponica* (Hanai); Yamaguchi et al.: 112, fig. 3.14.
- 2014 *Pontocythere subjaponica* (Hanai); Schornikov and Zenina: 215, pl. 7, fig. 7.
- 2014 *Pontocythere subjaponica* (Hanai); Masuma and Yamada: 6, fig. 4.14.
- 2016 *Pontocythere subjaponica* (Hanai); Matsushima et al.: 14, fig. 6K.

non

- 2008 *Pontocythere subjaponica* (Hanai); Hu and Tao: pl. 51, fig. 13; pl. 80, fig. 17; pl. 126, figs. 23, 25.

Family **Cytheridae** Baird, 1850

Genus ***Cythere*** Müller, 1785

***Cythere omotenipponica*** Hanai, 1959b

- Figure. 3 (8)

- 1959b *Cythere lutea omotenipponica* Hanai; Hanai: pl. 28, figs. 5a, 5b.
- 1966 *Cythere lutea omotenipponica* Hanai; Ishizaki: 137, pl. 17, figs. 9-12
- 1968 *Cythere lutea omotenipponica* Hanai; Ishizaki: pl. 3, figs. 7, 8.
- 1969 *Cythere lutea omotenipponica* Hanai; Ishizaki: pl. 26, fig. 9.
- 1970 *Cythere lutea omotenipponica* Hanai; Hanai: 710, 712-714, text-figs. 10A-E, 11A, 11E, 11J, 12A, 12N, 13B, 13D, 13D', 13F, 13H, 13H'.
- 1977b *Cythere simplex* Hu; Hu: 199, pl. 24, figs. 16, 17, 19, 20, 22, 23, 25; text-fig. 17.
- 1982 *Cythere simplexia* Hu; Hu: 178, pl. 4, figs. 9, 11.

- 1983 *Cythere omotenipponica* Hanai; Malz and Ikeya: 139, pl. 1, figs. 1-8.
- ?1984 *Cythere simplexia* Hu; Hu: 110, pl. 1, figs. 20, 24-27.
- 1985 *Pontocythere miurensis* (Hanai); Ikeya et al.: pl. 3, fig. 4.
- 1985 *Cythere lutea omotenipponica* Hanai; Zhao: 206, pl. 2, fig. 13.
- 5 1986 *Cythere simplexia* Hu; Hu: pl. 114, pl. 12, figs. 16, 22, 23, 25, 26.
- 1987 *Cythere omotenipponica* Hanai; Tsukagoshi and Ikeya, 202, figs. 4h, 5i, 9.1a, 9.1b.
- 1987 *Cythere lutea omotenipponica* Hanai; Wang Q. and Zhang: 290, pl. 1, figs. 33, 34.
- 1988 *Cythere omotenipponica* Hanai; Ikeya and Shiozaki: 137, pl. 3, figs. 1a, 1b.
- 1988 *Cythere omotenipponica* Hanai; Hanai: 22, text-figs. 3, 4.
- 10 1988 *Cythere lutea omotenipponica* Hanai; Wang et al.: 405, pl. 37, figs. 1-3.
- 1990 *Cythere omotenipponica* Hanai; Lee: 310, pl. 10, figs. 7-9.
- 1991 *Cythere omotenipponica* Hanai; Ikeya and Itoh: 135, fig. 14A.
- 1992 *Cythere omotenipponica* Hanai; Ikeya and Suzuki: 127, pl. 4, fig. 1.
- 1992 *Cythere omotenipponica* Hanai; Lee and Paik: 149, pl. 2, fig. 10.
- 15 1993 *Cythere omotenipponica* Hanai; Kamiya and Nakagawa: 125, pl. 2, fig. 10.
- 1994 *Cythere omotenipponica* Hanai; Zheng: pl. 49, fig. 17.
- 1996 *Cythere omotenipponica* Hanai; Tsukagoshi and Kamiya: 352, fig. 6.
- 1998 *Cythere omotenipponica* Hanai; Cao: pl. 2, figs. 15-20.
- 1998 *Cythere omotenipponica* Hanai; Irizuki et al.: 7, fig. 2.6.
- 20 1998 *Cythere omotenipponica* Hanai; Yamane: 43, pl. 4, fig. 5.
- 2001a *Cythere omotenipponica* Hanai; Irizuki et al.: 67, fig. 18.6.
- 2001 *Cythere omotenipponica* Hanai; Nakao et al.: 133, fig. 5.8.
- 2001 *Cythere omotenipponica* Hanai; Yasuhara and Irizuki: 79, pl. 4, figs. 15-17.
- 2004 *Cythere omotenipponica* Hanai; Tanaka et al.: 60, pl. 1, fig. 8.
- 25 2005 *Cythere omotenipponica* Hanai; Ishida and Takayasu: 76, fig. 2.7.
- 2007 *Cythere omotenipponica* Hanai; Hou and Gou: pl. 87, figs. 1-8.
- 2007 *Cythere omotenipponica* Hanai; Sasaki et al.: 524, fig. 5.16.
- 2008 *Cythere lutea omotenipponica* Hanai; Hu and Tao: pl. 43, figs. 12, 13, 15; pl. 101, figs. 9, 10, 20, 21; pl. 113, figs. 3.5; pl. 195, figs. 16, 20, 21; pl. 221, figs. 3, 15, 16, 18, 21.
- 30 ?2008 *Cythere lutea omotenipponica* Hanai; Hu and Tao: pl. 196, figs. 2, 3; pl. 209, fig. 21.
- 2008 *Cythere omotenipponica* Hanai; Yamada: 42, fig. 1A.
- 2009b *Cythere omotenipponica* Hanai; Irizuki et al.: 320, fig. 3.2.
- 2009 *Cythere omotenipponica* Hanai; Tanaka and Nomura: 61, fig. 3.19.
- 2012d *Cythere omotenipponica* Hanai; Tanaka et al.: 29, pl. 3, fig. 2.

2014 *Cythere omotenipponica* Hanai; Masuma and Yamada: 5, fig. 3.14.

2017 *Cythere omotenipponica* Hanai; Tsukagoshi: 16, fig. 3A.

Genus **Javanella** Kingma, 1948

5 ***Javanella kendengensis*** Kingma, 1948

Figure. 3 (9)

1948 *Javanella kendengensis* Kingma: pl. 10, figs. 6a, 6b, 6c.

1954 *Paradoxostoma* sp. Key [sic]: 357, pl. 3, fig. 9.

10 1969 *Javanella kendengensis* Kingma; McKenzie: 55, fig. 2.15.

1979 *Javanella kendengensis* Kingma; Keij: pl. 2, figs. 7, 8.

1982 *Pelliscustoma kendengensis* (Kingma); Cai: pl. 2, fig. 9.

1988 *Javanella kendengensis* Kingma; Gou and Chen: pl. 1, figs. 1-6; pl. 2, figs. 1-4, 8, 9.

1988 *Javanella kendengensis* Kingma; Zhao and Whatley: 165, pl. 1, fig. 8.

15 1991 *Javanella kendengensis* Kingma; Cai: pl. 7, figs. 15, 16.

1992 *Javanella kendengensis* Kingma; Mostafawi: 165, pl. 8, fig. 170.

?1993 *Javanella kendengensis* Kingma; Yassini et al.: 387, pl. 2, figs. 33-35.

1994 *Pelliscustoma kendengensis* (Kingma); Zheng: pl. 58, figs. 7, 8.

2007 *Javanella kendengensis* Kingma; Hou and Gou: pl. 164, figs. 1-10.

20 2008 *Javanella kendengensis* Kingma; Hu and Tao: pl. 167, fig. 20.

2009 *Javanella kendengensis* Kingma; Ramlan and Noraswana: 16, pl. 2, fig. 3.

non

1950 *Pellucistoma kendengensis* Kingma; van den Bold: pl. 18, fig. 6.

1957 *Pellucistoma kendengensis* Kingma; van den Bold: pl. 4, fig. 9.

25

Family **Leptocytheridae** Hanai, 1957

Genus ***Callistocythere*** Ruggieri, 1953

***Callistocythere asiatica*** Zhao, 1984

Figure. 3 (10)

30

1968 *Callistocythere* sp. A; Ishizaki: pl. 6, fig. 5.

1984 *Callistocythere asiatica* Zhao: 56, pl. 1, figs. 11-15.

1987 *Callistocythere asiatica* Zhao; Wang Q. and Zhang: pl. 1, fig. 27.

1988 *Callistocythere asiatica* Zhao; Wang et al.: 406, pl. 38, figs. 15, 16.



- 1988 *Callistocythere asiatica* Zhao; Ruan and Hao: pl. 56, figs. 1, 2.  
 1990 *Callistocythere asiatica* Zhao; Lee: 310, pl. 10, figs. 1-3.  
 1998 *Callistocythere asiatica* Zhao; Cao: pl. 4, figs. 7, 8.  
 2002a *Callistocythere asiatica* Zhao; Yasuhara et al.: 88, fig. 3.3.  
 5 2006 *Callistocythere asiatica* Zhao; Irizuki et al.: 23, fig. 6.2.  
 2007 *Callistocythere asiatica* Zhao; Hou and Gou: pl. 150, figs. 2-6.  
 2008 *Callistocythere asiatica* Zhao; Hu and Tao: pl. 112, figs. 12, 20; pl. 195, figs. 6, 10, 11; pl. 221, figs. 4, 9, 10, 11, 13.

non

- 10 1985 *Callistocythere asiatica* Zhao; Zhao: 206, pl. 2, fig. 9.  
 1987 *Callistocythere asiatica* Zhao; Wang Q. and Zhang: pl. 1, fig. 28.

Genus *Tanella* Kingma, 1948

*Tanella gracilis* Kingma, 1948

- 15 Figure. 3 (13)

- 1948 *Tanella gracilis* Kingma: 117, pl. 10, figs. 7a, 7b.  
 1968 *Leptocythere? tosaensis* Ishizaki: pl. 5, figs. 19, 20.  
 1971 *Tanella* cf. *gracilis* Kingma; Bate: 247, 249, pl. 1, fig. 1.ll; pl. 1, fig. 2.ll; pl. 2, fig. 1.ll; pl. 2, fig. 3.ll.  
 20 1973 *Tanella gracilis* Kingma; Teeter: 51, figs. 2m-p.  
 1977 *Tanella* aff. *gracilis* Kingma; Paik: 43, pl. 2, figs. 35-37.  
 1978 *Tanella gracilis* Kingma; Hartmann: 184, 223, figs. 108-113; table. 4, fig. 4-13.  
 1979 *Tanella gracilis* Kingma; Keij: pl. 1, figs. 7, 8.  
 1978 *Tanella gracilis* Kingma; Jain: 93, pl. 2, figs. J2-J4.  
 25 1980 *Tanella gracilis* Kingma; Hartmann: 178, 211, fig. 47; pl. 7, figs. 11-15, 16-18.  
 1981 *Tanella gracilis* Kingma; Hartmann: 134, 152, figs., 4, 5; pl. 3, figs. 7-14.  
 1982 *Jainella karwarensis* [sic] Kingma; Al-Abdul- Razzaq et al.: 67, fig. 7.  
 1982 *Tanella gracilis* Kingma; Cai: 8, pl. 4, fig. 22.  
 1988 *Tanella gracilis* Kingma; Cai: pl. 1, fig. 15.  
 30 1988 *Tanella* sp. cf. *T. gracilis* Kingma; Whatley and Zhao: 29, pl. 6, figs. 5-6.  
 1988 *Tanella gracilis* Kingma; Zhao and Whatley: 165, pl. 1, fig. 13.  
 ?1989 *Tanella gracilis darwini* Howe and Mckenzie: 21, fig. 93.  
 1989 *Tanella gracilis* Kingma; Whatley and Keeler: 79, 81, pl. 3, fig. 17; pl. 4, figs. 1-3.  
 ?1989 *Tanella gracilis darwini* Howe and Mckenzie: 35, pl. 3, fig. 36.

- 1990 *Leptocythere? tosaensis* Ishizaki; Ruan: 133, pl. 1, fig. 22.
- 1991 *Tanella gracilis* Kingma; Cai: pl. 4, fig. 22.
- 1992 *Tanella gracilis* Kingma; Mostafawi: 141, pl. 2, fig. 141.
- 1993 *Tanella gracilis* Kingma; Witte: 59, pl. 4, figs. 13-15.
- 5 1993 *Tanella gracilis gracilis* Kingma; Yassini et al.: 389, pl. 3, figs. 48-52.
- 1994 *Tanella gracilis* Kingma; Zheng: pl. 59, fig. 3.
- 1995 *Tanella gracilis* Kingma; Yassini and Jones: 414, figs. 239, 240.
- 1997 *Tanella gracilis* Kingma; Kumar and Hussain: pl. 1, fig. 7.
- 1998 *Tanella gracilis* Kingma; Cao: pl. 4, figs. 5, 6; pl. 5, fig. 1.
- 10 1998 *Tanella gracilis* Kingma; Hussain: 20, pl. 1, fig. 18.
- 1999 *Tanella gracilis* Kingma; Al-Jumaily and Al-Sheikhly: 229, fig. 16.
- 1999 *Tanella gracilis* Kingma; Carbonel et al.: 129, pl. 4, fig. 9.
- 2000 *Tanella gracilis* Kingma; Hussain and Mohan: 30, pl. 1, fig. 10.
- 2002 *Tanella gracilis* Kingma; Sridher et al.: 25, pl. 2, fig. 2.
- 15 2003 *Tanella gracilis* Kingma; Arul et al.: pl. 1, figs. 5-6.
- 2004 *Tanella gracilis* Kingma; Helal and Abdel-Wahab: 84, pl. 1, fig. 6.
- 2004 *Tanella gracilis* Kingma; Montenegro et al.: 233, pl. 2, fig. 10.
- 2006 *Tanella gracilis* Kingma; Hussain et al.: 1663, fig. 6.5.
- 2007 *Tanella gracilis* Kingma; Gopalakrishna et al.: 64, pl. 1, fig. 14.
- 20 ?2007 *Tanella darwini* Howe and Mckenzie; Hou and Gou: pl. 148, figs. 3.
- 2007 *Tanella gracilis* Kingma; Hou and Gou: pl. 148, figs. 4-7.
- 2007 *Tanella gracilis* Kingma; Noraswana et al.: 147, pl. 2, figs. 10, 11.
- 2008 *Leptocythere gracilis* (Kingma); Hu and Tao: pl. 195, figs. 8, 9, 12.
- 2009 *Tanella gracilis* s.l. Kingma; Tanaka et al.: 377, pl. 1, fig. 3.
- 25 ?2010 *Tanella gracilis* Kingma; Elumalai et al.: 17, fig. 1.
- 2010 *Tanella gracilis* Kingma; Ganesan and Hussain: 109, fig. 3C.
- 2012 *Tanella gracilis* Kingma; Mohammed and Keyser: 293, figs. 7, 97-100.
- 2013 *Tanella gracilis* Kingma; Baskar et al.: 203, fig. 3.5.
- 2013a *Tanella gracilis* Kingma; Hussain et al.: 203, fig. 3e.
- 30 2013b *Tanella gracilis* Kingma; Hussain et al.: 216, pl. 1, fig. 10.
- 2014 *Tanella gracilis* Kingma; Iwatani et al.: 515, text-fig. 4, 19.
- 2014 *Tanella gracilis* Kingma; Yamada et al.: 108, fig. 4I.
- 2015 *Tanella gracilis* Kingma; Mahalakshmi and Hussain: 273, pl. 1, fig. 9.
- 2017 *Tanella gracilis* Kingma; Hong et al.: 58, fig. 8.38.

2017 *Tanella gracilis* Kingma; Hussain: 153, pl. 1, fig. 7.

2018 *Tanella gracilis* Kingma; Ebtesam: 66, figs. 6e, 6f.

*Tanella* sp.

Figure. 3 (14)

5

2009 *Tanella* sp.; Tanaka et al.: 377, pl. 1, fig. 6.

Family Hemicysteridae Puri, 1953

Genus *Aurila* Pokorný, 1955

*Aurila cymba* (Brady, 1869)

Figure. 3 (16)

10

1869 *Cythere cymba* Brady: pl. 16, figs. 1-4, 10.

1880 *Cythere cymba* Brady; Brady: pl. 20, figs. 5a-f

15 1968 *Aurila miii* Ishizaki: pl. 2, fig. 9; pl. 4, figs. 1, 2.

1969 *Aurila miii* Ishizaki; Ishizaki: pl. 25, fig. 13

1971 *Aurila miii* Ishizaki; Ishizaki: pl. 2, fig. 1.

1980a *Aurila miii* Ishizaki; Wang et al.: pl. 7, fig. 4.

1981 *Aurila miii* Ishizaki; Gou et al.: 161, pl. 91, fig. 4.

20 1982 *Aurila miii* Ishizaki; Hou et al.: 373, pl. 75, figs. 1-10.

1983 *Aurila miii* Ishizaki; Gou et al.: 55, pl. 18, figs. 11-16.

1985 *Aurila miii* Ishizaki; Huang: pl. 1, fig. 11.

1985 *Aurila cymba* Brady; Ishizaki and Matoba: pl. 1, fig. 11.

1986 *Aurila miii* Ishizaki; Zheng: pl. 1, figs. 30, 31.

25 1987 *Aurila miii* Ishizaki; Zheng: 196, pl. 4, figs. 1-9.

1987a *Aurila cymba* (Brady); Whatley and Zhao: 28, pl. 2, figs. 9-12.

1987 *Aurila cymba* (Brady); Wang Q. and Zhang: 291, pl. 2, fig. 9.

1988 *Aurila cymba* (Brady); Ruan and Hao: 309, pl. 54, figs. 11-15.

1988 *Aurila cymba* (Brady); Wang Q. et al.: 103, pl. 1, fig. 32.

30 ?1989 *Aurila miii* Ishizaki; Ruan: pl. 1, fig. 14.

1990 *Aurila cymba* (Brady); Gou: 27, pl. 2, fig. 21.

1990 *Aurila cymba* (Brady); Lee: 320, pl. 15, figs. 1-3.

1990 *Aurila cymba* (Brady); Takayasu et al.: 145, pl. 1, fig. 9.

1990 *Aurila cymba* (Brady); Zhao and Wang: pl. 1, fig. 19.

- 1992 *Aurila cymba* (Brady); Lee and Paik: 151, pl. 3, fig. 4.  
 1994 *Aurila cymba* (Brady); Zheng: pl. 45, figs. 11-13.  
 1998 *Aurila cymba* (Brady); Cao: pl. 1, figs. 16, 21.  
 ?1998 *Aurila cymba* (Brady); Yamane: 37, pl. 1, figs. 5a-5d.
- 5 1998 *Aurila cymba* (Brady); Irizuki et al.: 7, fig. 2.9.  
 2000 *Aurila cymba* (Brady); Gou: pl. 14, fig. 14.  
 2000 *Aurila cymba* (Brady); Irizuki and Hosoyama: 12, fig. 3.8.  
 2002 *Aurila cymba* (Brady); Irizuki et al.: 39, pl. 1, figs. 7, 8.  
 2003a *Aurila cymba* (Brady); Irizuki et al.: 13, pl. 1, fig. 3.
- 10 2005 *Aurila cymba* (Brady); Irizuki et al.: 41, fig. 3.14.  
 2006 *Aurila cymba* (Brady); Irizuki et al.: 23, fig. 6.7.  
 2007 *Aurila cymba* (Brady); Hou and Gou: pl. 131, figs. 1-8.  
 2008 *Aurila miii* Ishizaki; Hu and Tao: pl. 175, figs. 21, 22; pl. 210, fig. 3; pl. 217, fig. 17.  
 ?2008 *Aurila miii* Ishizaki; Hu and Tao: pl. 65, figs. 10-12; pl. 209, fig. 18.
- 15 2008 *Aurila cymba* (Brady); Irizuki et al.: 295, fig. 7.  
 2015b *Aurila cymba* (Brady); Irizuki et al.: 153, fig. 4.7.

non

- 1980c *Aurila miii* Ishizaki; Wang et al.: pl. 11, fig. 20
- 20 1998 *Aurila cymba* (Brady); Cao: pl. 1, figs. 14, 15, 17-20.  
 2008 *Aurila miii* Ishizaki; Hu and Tao: pl. 65, figs. 6, 8; pl. 210, fig. 4; pl. 218, fig. 19.

*Aurila hataii* Ishizaki, 1968

Figure. 3 (17)

- 25
- 1954 *Cythere villosa* Baird; Imanishi: 90, fig. 2.  
 1968 *Aurila hataii* Ishizaki: pl. 1, figs. 5, 6; pl. 4, figs. 5, 6.  
 1971 *Aurila* cf. *hataii* Ishizaki; Ishizaki: pl. 2, figs. 2, 3.  
 1980 *Aurila hataii* Ishizaki; Okubo: 401, 407, 408, 410, figs. 3, 7g-j, 10a-f.
- 30 1984 *Aurila kianfascisma* Hu; Hu: 115, pl. 3, figs. 1-10.  
 1985 *Aurila hataii* Ishizaki; Ikeya et al.: pl. 4, figs. 1, 2.  
 1985 *Aurila hataii* Ishizaki; Ishizaki and Matoba: pl. 1, fig. 12.  
 1987 *Aurila uranouchiensis* Ishizaki; Wang Q. and Zhang: 291, pl. 2, fig. 8.  
 1990 *Aurila miii* ishizaki; Ruan: 133, pl. 1, fig. 13.

- 1990 *Aurila hataii* Ishizaki; Lee: 316, pl. 13, figs. 7, 10, 11.  
1991 *Aurila hataii* Ishizaki; Ikeya and Itoh: 131, fig. 10D.  
1992 *Aurila hataii* Ishizaki; Ikeya and Suzuki: 123, pl. 2, fig. 4.  
1992 *Aurila hataii* Ishizaki; Lee and Paik: 151, pl. 3, fig. 10.  
5 1993 *Aurila hatai* [sic] Ishizaki; Kamiya and Nakagawa: 127, pl. 3, fig. 5.  
1994 *Aurila hataii* Ishizaki; Zheng: pl. 45, figs. 9, 10, 14, 15.  
1998 *Aurila cymba* (Brady); Cao: pl. 1, figs. 14, 15, 17, 19.  
2001 *Aurila hataii* Ishizaki; Kamiya et al.: 93, fig. 13.1.  
2001 *Robustaurila ishizakii* (Okubo); Nakao et al.: 133, fig. 5.1.  
10 2007 *Aurila hataii* Ishizaki; Hou and Gou: pl. 131, figs. 16-18; pl. 133, fig. 1.  
2008 *Aurila hataii* Ishizaki; Hu and Tao: pl. 65, figs. 2, 4, 7, 9; pl. 113, figs. 14, 17-20; pl. 128, figs. 2, 4, 6; pl. 221, figs. 14,  
22  
2008 *Aurila imotoi* Ishizaki; Hu and Tao: pl. 65, fig. 15.  
2008 *Aurila miii* ishizaki; Hu and Tao: pl. 218, figs. 1, 4.  
15 2008 *Aurila uranouchiensis*; Hu and Tao: pl. 184, figs. 11, 13-16.  
2009b *Aurila hataii* Ishizaki; Irizuki et al.: 320, fig. 3.7.  
2009 *Aurila hataii* Ishizaki; Tanaka and Nomura: 61, fig. 3.6.  
2010 *Aurila hataii* Ishizaki; Ozawa and Domitsu: 4, fig. 3.6.  
2017 *Aurila hataii* Ishizaki; Tsukagoshi: 16, fig. 3F.  
20  
non  
2008 *Aurila hataii* Ishizaki; Hu and Tao: pl. 25, fig. 21; pl. 35, fig. 2; pl. 44, figs. 4, 5, 7-10; pl. 65, fig. 3; pl. 113, figs. 15,  
16; pl. 126, figs. 3, 5; pl. 221, fig. 17

25  
Genus *Caudites* Coryell and Fields, 1937  
*Caudites huyeni* Tanaka, Komatsu and Phong, 2009  
Figure. 4 (1)

2009 *Caudites huyeni*; Tanaka, Komatsu and Phong: 375, 381, text-fig. 6; pl. 3, figs. 1-22.

30  
Genus *Robustaurila* Yajima, 1982  
*Robustaurila splendideornata* (Hartmann, 1974).  
Figure. 4 (3)

- 1954 *Hemicythere packkardi* (Brady); Key: 355, pl. 2, fig. 1.2.  
1974 *Mutilus splendideornatus* Hartmann, 417, 418, pl. 49, figs. 375-381; pl. 50, figs. 382-384; pl.150, fig. 9.  
1978 *Mutilus splendideornatus* australiensis (Hartmann); Hartmann: 99, 227, figs. 223-230; pl. 99, figs. 10-16.  
1979 *Radimella virgata* (Hu); Hu: 63, pl.1, figs. 18-20, 22.  
5 1981b *Radimella virgata* (Hu); Hu: 88, pl. 3, figs. 1, 5, 6.  
1985 *Radimella virgata* (Hu); Zhao et al.: 352, pl. 20, fig. 5.  
1986 *Sinoradimella microcostata* Hu and Tao: 56, pl. 2, figs. 1-3; figs. 2.2, 2.3.  
1989 *Mutilus curvicostatus* Howe and McKenzie: 39, figs. 116, 161.  
1989 *Mutilus splendideornatus* Hartmann, Howe and McKenzie: 38, figs. 111-113.  
10 ?1989 *Mutilus splendideornatus* Hartmann, Whatley and Keeler: 79, pl. 3, figs. 1-3.  
?1990 *Radimella minor* (Hu); Ruan: 133, pl. 1, fig. 21.  
?1990 *Radimella* cf. *virgata* (Hu); Tabuki and Nohara: 377, pl. 2, fig. 2.  
1990 *Robustaurila splendideornatus australiensis* (Hartmann); Gou: 27, pl. 2, figs. 26, 27.  
1992 *Mutilus australiensis* Hartmann; Mostafawi: 144, pl. 3, fig. 54.  
15 2005 *Auradilus australiensis* Hartmann; Mostafawi et al.: 128, pl. 2, figs. 4, 5.  
2006 *Mutilus splendideornatus* Hartmann; Warne et al.: 119, pl. 4, figs. 4-6.  
2007 *Robustaurila australiensis* (Hartmann); Hou and Gou: pl. 136, figs. 6-8; pl. 196, fig. 19.  
2008 *Sinoradimera virgata* (Hu); Hu and Tao: pl. 67, fig. 19; pl. 176, figs. 3, 6, 9, 15;  
2012 *Mutilus splendideornatus* Hartmann; Mohammed and Keyser: 261, figs. 6.73-76.

20

Family Loxoconchidae Sars, 1925

Genus *Loxoconcha* Sars, 1866

*Loxoconcha japonica* Ishizaki, 1968

25

Figure. 4 (5)

- 1913 *Loxoconcha impressa* (Baird); Kajiyama: pl. 1, figs. 50, 51.  
1968 *Loxoconcha japonica* Ishizaki: pl. 2, fig. 1; pl. 6, figs. 10-12.  
1971 *Loxoconcha japonica* Ishizaki; Ishizaki: pl. 3, fig. 21.  
30 1979 *Loxoconcha japonica* Ishizaki; Hu: 69, 70, pl. 2, figs. 32-37; text-fig. 2.  
1980 *Loxoconcha japonica* Ishizaki; Okubo: 416-418, figs. 12, 13, 18a-d.  
1981a *Loxoconcha japonica* Ishizaki; Hu: 77, pl. 3, figs. 1-4, 8, text-fig. 14.  
1981a *Loxoconcha shanhaiensis* Hu; Hu: 76, pl. 3, figs. 5, 9, 11; text-figs. 13A, 13B.  
1982 *Loxoconcha shanhaiensis* Hu; Hu: 180, 182, pl. 2, fig. 23.

- 1983 *Loxococoncha japonica* Hu; Hu: 156, 157, pl. 2, figs. 3, 4, 6, 7.
- 1984 *Loxococoncha japonica* Hu; Hu: 116, pl. 4, figs. 24-26.
- 1984 *Loxococoncha shanghaiensis* Hu; Hu: 116, pl. 3, figs. 21-23, 27.
- 1986 *Loxococoncha japonica* Hu; Hu: 162, pl. 4, figs. 22, 28, 30, 31.
- 5 1986 *Loxococoncha japonica* Hu; Hu and Tao: 62, pl. 3, figs. 22, 23, 26.
- 1986 *Loxococoncha shanghaiensis* Hu; Hu and Tao: 62, pl. 3, figs. 20, 24, 25.
- 1987 *Loxococoncha sinensis* Brady; Wang Q. and Zhang: 290, pl. 1, fig. 20.
- 1988 *Loxococoncha tumulosum* Hu; Cai: pl. 2, fig. 13.
- 1988 *Loxococoncha japonica* Ishizaki; Ikeya and Shiozaki: 139, pl. 4, figs. 1a, 1b.
- 10 1988a *Loxococoncha japonica* Ishizaki; Kamiya: 307, 308, 310, 311, 313-316; pl. 1, figs. 1-7; text-figs. 4, 5, 7, 8, 10, 11, 13.
- 1988b *Loxococoncha japonica* Ishizaki; Kamiya: 319, pl. 1, figs. 1-6.
- 1988c *Loxococoncha japonica* Ishizaki; Kamiya: pl. 1, figs. 9-16.
- 1988 *Loxococoncha japonica* Ishizaki; Ruan and Hao: 323, pl. 57, figs. 11-13.
- 1989a *Loxococoncha japonica* Ishizaki; Kamiya: 39-41, 43-45, pl. 1, figs. 1, 2, 5-8, 13, 14, 17; pl. 2, figs. 1-3, 10; figs. 1-8.
- 15 1989b *Loxococoncha japonica* Ishizaki; Kamiya: figs. 3, 4, 6, 7, 9, 11, 12.
- 1990 *Loxococoncha japonica* Ishizaki; Lee: 358, pl. 34, figs. 3, 4.
- 1990 *Loxococoncha japonica* Ishizaki; Ruan: 134, pl. 2, fig. 3.
- 1991 *Loxococoncha japonica* Ishizaki; Cai: 122, pl. 7, fig. 12.
- 1992 *Loxococoncha japonica* Ishizaki; Ikeya and Suzuki: 129, pl. 5, fig. 9.
- 20 1992 *Loxococoncha japonica* Ishizaki; Kamiya and Hazel: 160-163, figs. 1, 3, 4; pl. 1.
- 1993 *Loxococoncha japonica* Ishizaki; Kamiya and Nakagawa: 131, pl. 5, figs. 11, 12.
- 1994 *Loxococoncha japonica* Ishizaki; Zheng: pl. 53, fig. 13.
- 1996 *Loxococoncha japonica* Ishizaki; Ozawa: 112, pl. 6, fig. 5.
- 1998 *Loxococoncha japonica* Ishizaki; Cao: pl. 3, figs. 16-19.
- 25 1998 *Loxococoncha japonica* Ishizaki; Irizuki et al.: 8, fig. 3.5.
- 1998 *Loxococoncha japonica* Ishizaki; Yamane: pl. 5, fig. 2.
- 2001 *Loxococoncha japonica* Ishizaki; Kamiya et al.: 101, fig. 17.9.
- 2001 *Loxococoncha cf. japonica* Ishizaki; Tabuki, 33, fig. 10.1.
- 2001 *Loxococoncha japonica* Ishizaki; Yasuhara and Irizuki: pl. 6, fig. 12.
- 30 2002 *Loxococoncha japonica* Ishizaki; Tanaka: 26, figs. 1c, 1d
- 2002 *Loxococoncha japonica* Ishizaki; Tanaka and Ikeya: 66, 270-272, 274, fig. 1; figs. 3.1-3.6, 5A, 5a, 7A, 9.1, 9.2.
- 2003 *Loxococoncha japonica* Ishizaki; Smith and Kamiya: 33, 34, 36-39, 41, 42, 44-49, figs. 1-14.
- 2005 *Loxococoncha japonica* Ishizaki; Ishii et al.: 83, 89-92, fig. 1A; figs. 4-7.
- 2005 *Loxococoncha japonica* Ishizaki; Smith et al.: 141, fig. 2.

- 2006 *Loxoconcha japonica* Ishizaki; Irizuki et al.: 25, fig. 8.2.
- 2007 *Loxoconcha japonica* Ishizaki; Hou and Gou: pl. 155, figs. 13, 14.
- 2007 *Loxoconcha japonica* Ishizaki; Sasaki et al.: 524, fig. 5.18.
- 2008 *Loxoconcha hsiyü* Hu and Tao: pl. 49, fig. 24; pl. 73, figs. 1, 3, 6, 17; pl. 122, fig. 1; pl. 131, figs. 5, 8; pl. 135, fig. 3;  
5 pl. 151, fig. 10; pl. 155, figs. 6, 7, 9; pl. 167, fig. 14; pl. 180, figs. 12, 16, 20; pl. 202, figs. 6, 7, 15; pl. 215, fig. 1
- ?2008 *Loxoconcha hsiyü* Hu and Tao: pl. 30, fig. 9.
- 2008 *Loxoconcha japonica* Ishizaki; Hu and Tao: pl. 73, figs. 2, 5, 12, 24; pl. 122, fig. 2; pl. 131, figs. 6, 7; pl. 151, figs. 12-  
14; pl. 155, fig. 5; pl. 180, figs. 5, 13, 15, 19; pl. 202, figs. 3, 13, 20.
- 2009 *Loxoconcha japonica* Ishizaki; Tanaka and Nomura: 62, fig. 4.3.
- 10 2010 *Loxoconcha japonica* Ishizaki; Kaji and Tsukagoshi: 358, fig. 5C, 5K.
- 2010 *Loxoconcha japonica* Ishizaki; Morishita et al.: 539, fig. 11.
- 2012a *Loxoconcha japonica* Ishizaki; Tanaka et al.: 117, pl. 1, fig. 11.
- 2013 *Loxoconcha japonica* Ishizaki; Kawano et al.: 96, fig. 5.7.
- 2014 *Loxoconcha japonica* Ishizaki; Masuma and Yamada: 5, fig. 3.24.
- 15 2017 *Loxoconcha japonica* Ishizaki; Tsukagoshi: 16, 20, figs. 2D, 8.1.2.
- non
- 2008 *Loxoconcha japonica* Ishizaki; Hu and Tao: pl. 151, figs. 1, 2; pl. 155, figs. 15, 17.

*Loxoconcha malayensis* Zhao and Whatley, 1989

20

Figure. 4 (6)

- 1981 *Loxoconcha nozokiensis* Ishizaki; Gou et al.: 166, pl. 81, figs. 4, 20; pl. 91, fig. 10.
- 1988 *Loxoconcha nozokiensis* Ishizaki; Cai: pl. 2, fig. 5.
- 1988 *Loxoconcha kattoi* Ishizaki; Ruan and Hao: 323, pl. 57, figs. 14-16.
- 25 1989 *Loxoconcha malayensis* Zhao and Whatley: 175 pl. 1, figs. 15-18; pl. 2, fig. 1
- 2007 *Loxoconcha malayensis* Zhao and Whatley; Hou and Gou: pl. 153, fig. 17; pl. 155, fig. 19.
- ?2008 *Loxoconcha sinensis* (Brady); Hu and Tao: pl. 8, fig. 20.
- ?2008 *Loxoconcha viva* (Ishizaki); Hu and Tao: pl. 50, fig. 4.
- 2011 *Loxoconcha malayensis* Zhao and Whatley; Tanaka et al.: 84, fig. 6A.

30

*Loxoconcha uranouchiensis* Ishizaki, 1968

Figure. 4 (7)

- 1968 *Loxoconcha uranouchiensis* Ishizaki: pl. 7, figs. 2, 3.



- 1969 *Loxoconcha uranouchiensis* Ishizaki; Ishizaki: pl. 26, fig. 15.
- 1971 *Loxoconcha uranouchiensis* Ishizaki; Ishizaki: pl. 3, fig. 17.
- ?1977b *Loxoconcha uranouchiensis* Ishizaki; Herrig, 1261, 1267, fig. 6; pl. 2, figs. 3, 4.
- 1978 *Loxoconcha uranouchiensis* Ishizaki; Guan in Hubei Institute of Geology and Science: 280, pl. 73, figs. 8-10.
- 5 1980 *Loxoconcha uranouchiensis* Ishizaki; Okubo: 421, 427, figs. 15, 19a-f.
- 1981 *Loxoconcha uranouchiensis* Ishizaki; Gou et al.: 166, pl. 81, figs. 11, 12.
- 1985 *Loxoconcha uranouchiensis* Ishizaki; Ishizaki and Matoba: pl. 5, fig. 1.
- 1988 *Loxoconcha uranouchiensis* Ishizaki; Ikeya and Shiozaki: 139, pl. 4, figs. 4a, 4b.
- 1988a *Loxoconcha uranouchiensis* Ishizaki; Kamiya: 307, 308, 310-313, 315, 316, pl. 1, figs. 1-7; text-figs. 4, 5, 7, 8, 9, 11,  
10 13.
- 1988b *Loxoconcha uranouchiensis* Ishizaki; Kamiya: 319, pl. 1, figs. 7-12.
- 1988c *Loxoconcha uranouchiensis* ishizaki; Kamiya: 345, pl. 1, figs. 1-8.
- 1988 *Loxoconcha uranouchiensis* Ishizaki; Ruan and Hao: 326, pl. 58, figs. 1-4.
- 1989a *Loxoconcha uranouchiensis* Ishizaki; Kamiya: 39-41, 43-45, pl. 1, figs. 3, 4, 9-12, 15, 16, 18, 19; pl. 2, 4-9, 11; figs.  
15 1-8.
- 1989b *Loxoconcha uranouchiensis* Ishizaki; Kamiya: 79, 81, 82, figs. 4.3.4, 6, 7.
- 1990 *Loxoconcha sinensis* (Brady); Ruan: 134, pl. 2, fig. 4.
- 1990 *Loxoconcha viva* (Ishizaki); Ruan: 134, pl. 2, fig. 5.
- 1990 *Loxoconcha uranouchiensis* Ishizaki; Takayasu et al.: 145, pl. fig. 15.
- 20 1991 *Loxoconcha uranouchiensis* Ishizaki; Ikeya and Itoh: 139, fig. 18A.
- 1992 *Loxoconcha uranouchiensis* Ishizaki; Ikeya and Suzuki: 131, pl. 6, fig. 4.
- 1992 *Loxoconcha uranouchiensis* Ishizaki; Kamiya and Hazel: 160, 162, 164, 165, figs. 1, 3, 5; pl. 2.
- 1993 *Loxoconcha uranouchiensis* Ishizaki; Kamiya and Nakagawa: 133, pl. 6, fig. 8.
- 1998 *Loxoconcha uranouchiensis* Ishizaki; Irizuki et al.: 8, fig. 3.8.
- 25 1998 *Loxoconcha uranouchiensis* Ishizaki; Yamane: 47, pl. 6, fig. 7.
- 1998 *Loxoconcha uranouchiensis* Ishizaki; Tanaka et al.: 91, pl. 1, fig. 16.
- 2000 *Loxoconcha uranouchiensis* Ishizaki; Irizuki and Hosoyama: 12, fig. 3.17.
- 2001 *Loxoconcha uranouchiensis* Ishizaki; Kamiya et al.: 103, fig. 18.7.
- 2001 *Loxoconcha uranouchiensis* Ishizaki; Nakao et al.: 133, fig. 5.16.
- 30 2001 *Loxoconcha uranouchiensis* Ishizaki; Tabuki: 39, fig. 14.6.
- 2001 *Loxoconcha uranouchiensis* Ishizaki; Yasuhara and Irizuki: 85, pl. 7, figs. 1.2.
- 2002 *Loxoconcha uranouchiensis* Ishizaki; Irizuki et al.: 39, pl. 1, fig. 18.
- 2002b *Loxoconcha uranouchiensis* Ishizaki; Yasuhara et al.: 635, fig. 3.8.
- 2002 *Loxoconcha uranouchiensis* Ishizaki; Tanaka and Ikeya: 266, fig. 1.

- 2004 *Loxoconcha uranouchiensis* Ishizaki; Irizuki: 77, pl. 3, fig. 3.
- 2004 *Loxoconcha uranouchiensis* Ishizaki; Yasuhara et al.: 31-33, figs. 13, 15.
- 2005 *Loxoconcha uranouchiensis* Ishizaki; Irizuki et al.: 42, fig. 4.15.
- 2005 *Loxoconcha uranouchiensis* ishizaki; Ishii et al.: 83, fig. 1B.
- 5 2006 *Loxoconcha uranouchiensis* Ishizaki; Irizuki et al.: fig. 8.7.
- 2007 *Loxoconcha uranouchiensis* Ishizaki; Hou and Gou: pl. 153, fig. 9; pl. 169, fig. 20, 21.
- 2007 *Loxoconcha uranouchiensis* Ishizaki; Sasaki et al.: 524, fig. 5.27.
- 2008 *Loxoconcha prunulla* Hu and Tao: pl. 142, figs. 13, 17; pl. 150, fig. 3.
- 2008 *Loxoconcha pashihaiensis* Hu; Hu and Tao: pl. 203, figs. 3-6.
- 10 2008 *Loxoconcha uranouchiensis* Ishizaki; Irizuki et al.: 295, fig. 7; pl. 219, figs. 11, 14, 16.
- 2008 *Loxoconcha uranouchiensis* Ishizaki; Nakao et al.: 281, fig. 3F.
- 2009 *Loxoconcha uranouchiensis* Ishizaki; Horikoshi et al.: 154, fig. 5.7.
- 2012c *Loxoconcha uranouchiensis* Ishizaki; Tanaka et al.: 9, fig. 4I.
- 2012d *Loxoconcha uranouchiensis* Ishizaki; Tanaka et al.: 28, pl. 2, fig. 8.
- 15 2014 *Loxoconcha uranouchiensis* Ishizaki; Masuma and Yamada: 6, fig. 4.2.
- 2014 *Loxoconcha uranouchiensis* Ishizaki; Schornikov and Zenina: 221, pl. 6, figs. 7, 8.
- 2014 *Loxoconcha uranouchiensis* Ishizaki; Tabuki and Nakanishi: 264, pl. fig. 7.
- 2017 *Loxoconcha uranouchiensis* Ishizaki; Tsukagoshi: 20, fig. 8.3, 4.
- 20 non
- 1987 *Loxoconcha uranouchiensis* Ishizaki; Cai and Chen: pl. 2, fig. 2.
- 1987 *Loxoconcha uranouchiensis* Ishizaki; Wang Q. and Zhang: 290, pl. 1, fig. 23.
- 1990 *Loxoconcha uranouchiensis* Ishizaki; Tabuki and Nohara: 377, pl. 2, fig. 9.
- 2008 *Loxoconcha uranouchiensis* Ishizaki; Hu and Tao: pl. 39, fig. 20.
- 25 ?2008 *Loxoconcha uranouchiensis* Ishizaki; Hu and Tao: pl. 30, figs. 23, 25; pl. 31, figs. 3, 6; pl. 40, figs. 6, 19; pl. 58, fig. 2.

*Loxoconcha vietnamensis* Tanaka, Komatsu and Phong, 2009

Figure. 4 (8)

- 30 2009 *Loxoconcha vietnamensis* Tanaka, Komatsu and Phong: 373, 377, 379, text-fig. 5; pl. 1, fig. 5; pl. 2, figs. 23-33, 34-44.

Family Trachyleberididae Sylvester-Bradley, 1948  
Genus *Bicornucythere* Schornikov and Shaytarov, 1979

*Bicornucythere bisanensis* (Okubo, 1975)

Figure. 4 (9)

- 1866 *Cythere hodgii* (Brady); Brady: 373, pl. 59, figs. 3a, 3b.
- 5 1880 *Cythere hodgii* (Brady); Brady: pl. 25, figs. 1a-1d.
- 1913 *Cythereis hodgei* [sic] (Brady); Kajiyama: pl. 1, figs. 70, 71.
- 1968 *Leguminocythereis hodgii* (Brady); Ishizaki: pl. 5, figs. 3, 4.
- 1969 *Leguminocythereis hodgii* (Brady); Ishizaki: pl. 25, fig. 15; pl. 26, fig. 7.
- 1971 *Leguminocythereis hodgii* (Brady); Ishizaki: pl. 3, figs. 6, 7.
- 10 ?1971 *Trachyleberis discreta* Schneider: 260, figs. c, d.
- 1972 *Leguminocythereis hodgii* (Brady); Ishizaki: 700, 709, 711, fig. 2; pl. 7, figs. 1-13; pl. 8, figs. 1-10.
- 1975 *Leguminocythereis? hodgii* (Brady); Ishizaki: 249, 253, 260, pl. 1, 2; text-fig. 2.
- 1975 *Leguminocythereis bisanensis* Okubo: 26, figs. 2, 3.
- 1977a *Leguminocythereis taiwanensis* Hu: 97, pl. 1, figs. 1-4, 9, 22; text-fig. 15.
- 15 1977b *Leguminocythereis elongatus* (Hu): Hu: 196, pl. 24, figs. 18, 24, 26; text-figs. 1, 2.
- 1978 *Leguminocythereis hodgii* (Ishizaki); Guan in Hubei Institute of Geology and Science: 258, pl. 68, figs. 11, 12.
- ?1978 *Leguminocythereis fava* Hu: 153, fig. 2; pl. 1, figs. 1-3.
- 1979 *Bicornucythere bisanensis* (Okubo) Schornikov and Shaytarov: 45, pl. 3, figs. 1-6; text-figs. 1, 2.
- 1980a *Leguminocythereis hodgii* (Ishizaki); Wang et al.: pl. 7, fig. 5.
- 20 ?1980b *Leguminocythereis hodgii* (Ishizaki); Wang et al.: pl. 10, fig. 5.8.
- 1980 *Leguminocythereis hodgii* (Ishizaki); Laboratory of Micropaleontology Department of Marine Geology, Tung-chi University: pl. 18, figs. 16-18.
- 1981 *Leguminocythereis? hodgii* (Ishizaki); Gou et al.: pl. 79, figs. 19, 20.
- 1981 *Bicornucythere bisanensis* (Okubo); Okada: 278, 279, figs. 2, 3.
- 25 1982 *Leguminocythereis hodgii* (Ishizaki); Cai: pl. 4, figs. 10, 13, 14.
- 1982 *Leguminocythereis? hodgii* (Ishizaki); Hou et al.: 374, 386, pl. 76, figs. 1-16, 20; pl. 88, figs. 24, 25.
- 1982 *Bicornucythere bisanensis* (Okubo); Okada: 86, fig. 1.
- 1983 *Keijella bisanensis* (Okubo); Abe: 470, 471, figs. 14, 15; pl. 26, fig. 1-21; pl. 27, fig. 1-7.
- 1983 *Leguminocythereis hodgii* (Ishizaki); Gou et al.: 60, fig. 20. pl. 15; figs. 7-14.
- 30 1984 *Bicornucythere elongatus* (Hu); Hu: 103, 120, text-fig. 36; pl. 6, figs. 24, 25, 27-30.
- 1984 *Bicornucythere bisanensis* (Okubo); Ishizaki: 42, pl. 1, fig. 8.
- 1985 *Leguminocythereis hodgii* (Ishizaki); Huang: 46, pl. 1, figs. 1, 2.
- 1985 *Bicornucythere bisanensis* (Okubo); Ikeya et al.: pl. 5, fig. 7.
- 1985 *Bicornucythere bisanensis* (Okubo); Ishizaki and Matoba: pl. 2, fig. 5.

- 1985 *Bicornucythere bisanensis* (Okubo); Wang and Bian: 347, pl. 15, fig. 11.
- 1985 *Bicornucythere bisanensis* (Okubo); Wang and Zhao: 339, pl.8, fig. 17.
- 1985 *Bicornucythere bisanensis* (Okubo); Wang et al.: 343, pl. 11, fig. 17.
- 1985 *Bicornucythere bisanensis* (Okubo); Zhao: 206, pl. 2, fig. 3.
- 5 1985 *Bicornucythere bisanensis* (Okubo); Zhao et al.: pl. 20, fig. 1.
- 1986 *Bicornucythere bisanensis* (Okubo); Cheong et al.: 48, pl. 3, fig. 4.
- 1986 *Leguminocythereis hodgii* (Ishizaki); Hou and Zhao: pl. 7, figs. 8, 9.
- 1986 *Bicornucythere bisanensis* (Okubo); Hu: 133, pl. 24, figs. 18-21.
- 1986 *Bicornucythere bisanensis* (Okubo); Zhao et al.: pl. 1, fig. 4
- 10 1986 *Leguminocythereis hodgii* (Ishizaki); Zheng: pl. 2, figs. 6, 7, 8.
- 1987 *Leguminocythereis hodgii* (Ishizaki); Cai and Chen: pl. 2, fig. 16.
- 1987 *Leguminocythereis hodgii* (Ishizaki); Zheng: 197, pl. 4, figs. 19-22.
- 1987 *Keijella bisanensis* (Okubo); Wang Q. and Zhang: 291, pl. 2, figs. 15, 16.
- 1988 *Keijella bisanensis* (Okubo); Abe: 922, pl. 1, figs. 1-6.
- 15 1988 *Bicornucythere bisanensis* (Okubo); Cai: pl. 1, figs. 3-5.
- 1988 *Bicornucythere bisanensis* (Okubo); Ruan and Hao: 362, pl. 55, figs. 19-23.
- 1988 *Keijella bisanensis* (Okubo); Hanai: 24, pl. 2, figs. 5, 6.
- 1988 *Keijella bisanensis* (Okubo); Wang Q. et al.: 103, pl. 1, fig. 6.
- 1988 *Bicornucythere bisanensis* (Okubo); Wang et al.: 413, pl. 45, figs. 7-9.
- 20 1989 *Bicornucythere bisanensis* (Okubo); Gou and Gong: 118, pl. 2, figs. 1, 2.
- 1989 *Bicornucythere bisanensis* (Okubo); Ruan: pl. 2, figs. 12-14.
- 1990 *Bicornucythere bisanensis* (Okubo); Ishizaki: 214, fig. 1.4.
- 1990 *Bicornucythere bisanensis* (Okubo); Lee: 330, pl. 25, figs. 12, 13.
- 1990 *Bicornucythere bisanensis* (Okubo); Takayasu et al.: 145, pl. fig. 8.
- 25 1990 *Bicornucythere bisanensis* (Okubo); Yajima and Lord: 157, fig. 7.3.
- 1990 *Keijella bisanensis* (Okubo); Zhao and Wang: pl. 1, fig. 14.
- ?1991 *Bicornucythere bisanensis* (Okubo); Cai: pl. 3, fig. 7.
- 1991 *Bicornucythere bisanensis* (Okubo); Ikeya and Itoh: 133, fig. 12, A.
- 1992 *Bicornucythere bisanensis* (Okubo); Lee and Paik: 153, pl. 4, fig. 15.
- 30 1993 *Bicornucythere bisanensis* (Okubo); Ikeya and Shiozaki: 17, 29, 30, figs. 2, 3A-3C, 13, 14.
- 1993 *Bicornucythere bisanensis* (Okubo); Kamiya and Nakagawa: 129, pl. 4, fig. 11.
- 1994 *Bicornucythere bisanensis* (Okubo); Zheng: pl. 46, figs. 13, 14.
- 1996 *Bicornucythere bisanensis* (Okubo); Kamiya et al.: 165, pl. 4, figs. 5, 6.
- 1996 *Bicornucythere bisanensis* (Okubo); Ozawa: 108, pl. 2, fig. 2.

- 1998 *Bicornucythere bisanensis* (Okubo); Cao, pl. 5, figs. 2-7.
- 1998 *Bicornucythere bisanensis* (Okubo); Irizuki et al.: 8, fig. 3.2.
- 1998 *Bicornucythere bisanensis* (Okubo); Tanaka et al.: 88, 91, fig. 6; pl. 1, fig. 8.
- 1998 *Bicornucythere bisanensis* (Okubo); Yamane: 39, pl. 2, fig. 4.
- 5 1999 *Bicornucythere bisanensis* (Okubo); Irizuki et al.: 100, fig. 1.
- 2000 *Bicornucythere bisanensis* (Okubo); Gou: pl. 13, figs. 18, 19.
- 2000 *Bicornucythere bisanensis* (Okubo); Irizuki and Hosoyama: 12, fig. 3.13.
- 2001b *Bicornucythere bisanensis* (Okubo); Irizuki et al.: 109, figs. 3, 10, 11, 13, 14.
- 2001 *Bicornucythere bisanensis* (Okubo); Kamiya et al.: 101, fig. 17.1.
- 10 2001 *Bicornucythere bisanensis* (Okubo); Nakao et al.: 141, fig. 11.6.
- 2001 *Bicornucythere bisanensis* (Okubo); Yasuhara and Irizuki: 75, pl. 2, figs. 9-20.
- 2002 *Bicornucythere bisanensis* (Okubo); Nakao and Tsuhkagoshi: 89, figs. 11K-N.
- 2002 *Bicornucythere bisanensis* (Okubo); Tanaka: 27, figs. 2, 2c.
- 2002b *Bicornucythere bisanensis* (Okubo); Yasuhara et al.: 635, figs. 3, 1, 2.
- 15 2003a *Bicornucythere bisanensis* (Okubo); Irizuki et al.: 13, pl. 1, fig. 5.
- 2003b *Bicornucythere bisanensis* (Okubo); Irizuki et al.: 155, fig. 4.
- 2003 *Bicornucythere bisanensis* (Okubo); Yamaguchi: 135, 149, figs. 1Z, 10L.
- 2003 *Bicornucythere bisanensis* (Okubo); Yasuhara et al.: 530, figs. 2, 3, 4.
- 2004 *Bicornucythere bisanensis* (Okubo); Irizuki and Seto: 314, fig. 4.
- 20 2004 *Bicornucythere bisanensis* (Okubo); Yasuhara et al.: 31-33, figs. 13-15.
- 2005 *Bicornucythere bisanensis* (Okubo); Irizuki et al.: 42, fig. 4.6.
- 2005 *Bicornucythere bisanensis* (Okubo); Ishida and Takayasu: 76, fig. 2.4.5.
- 2005 *Bicornucythere bisanensis* (Okubo); Yasuhara et al.: 289, fig. 3.3.4.
- 2006 *Bicornucythere bisanensis* (Okubo); Yasuhara and Seto: 106, figs. 4d, 4e.
- 25 2008 *Bicornucythere bisanensis* (Okubo); Nakao et al.: 281, fig. 3B.
- 2007 *Bicornucythere bisanensis* (Okubo); Hou and Gou: pl. 183, figs. 1-7.
- 2007 *Bicornucythere bisanensis* (Okubo); Sasaki et al.: 524, fig. 5.21.
- 2008 *Keijella bisanensis* (Okubo); Hu and Tao: pl. 6, figs. 6, 15, 19-22; pl. 28, figs. 2-4; pl. 37, figs. 11, 12, 15; pl. 56, figs. 8-11, 13, 14; pl. 85, figs. 8, 11, 12, 14-18, 20-22; pl. 90, figs. 14, 18, 21; pl. 91, figs. 1, 2, 6, 7; pl. 95, figs. 18, 21; pl. 106, fig. 7; pl. 116, figs. 17, 20, 21; pl. 134, fig. 18; pl. 140, figs. 3, 5-7, 11, 14, 18, 22; pl. 149, fig. 5; pl. 163, figs. 14, 17, 19, 20; pl. 164, figs. 1, 4, 8; pl. 179, figs. 3, 5, 6; pl. 187, figs. 13, 19, 20; pl. 199, figs. 4-12, 14, 15; pl. 211, fig. 10, pl. 212, figs. 1-7, 9; pl. 218, figs. 9, 11, 12, 16; pl. 224, figs. 4-6
- ?2008 *Keijella bisanensis* (Okubo); Hu and Tao: pl. 2, figs. 2-5, 7; pl. 7, figs. 1, 10; pl. 18, figs. 3-6, 8.

- 2008 *Keijella hodgii* (Brady); Hu and Tao: pl. 6, figs. 1, 4, 7-14, 16, 18; pl. 7, figs. 7, 21; pl. 11, figs. 1, 4, 6; pl. 18, figs. 7, 9; pl. 19, figs. 7, 9, 11, 14, 16; pl. 95, fig. 19; pl. 96, figs. 2, 5; pl. 106, figs. 4-6, 8; pl. 149, figs. 6, 7; pl. 163, figs. 11, 15, 16; pl. 179, fig. 4; pl. 199, figs. 13, 16, 21; pl. 224, figs. 1-3.
- ?2008 *Keijella hodgii* (Brady); Hu and Tao: pl. 47, figs. 12, 14; pl. 85, fig. 19; pl. 210, fig. 5; pl. 223, figs. 13, 16.
- 5 2008 *Bicornucythere bisanensis* (Okubo); Nakao and Tsukagoshi: 273, pl. 5, figs. A-D.  
 2008 *Bicornucythere bisanensis* (Okubo); Yamada: 42, figs. 1I, 3.  
 2009 *Bicornucythere bisanensis* (Okubo); Horikoshi et al.: 154, fig. 5.3.  
 2009a *Bicornucythere bisanensis* (Okubo); Irizuki et al.: 5, figs. 4.4, 4.5.  
 2009b *Bicornucythere bisanensis* (Okubo); Irizuki et al.: 320, fig. 3.14.
- 10 2009 *Bicornucythere bisanensis* (Okubo); Ozawa: 236, figs. 3, 7-13, 16.  
 2009 *Bicornucythere bisanensis* s.l. (Okubo); Tanaka and Nomura: 61, fig. 3.9.  
 2009 *Bicornucythere bisanensis* s.l. (Okubo); Tanaka et al.: 377, pl. 1, fig. 11.  
 2009 *Bicornucythere bisanensis* (Okubo); Zhao et al.: pl.1, fig. 37.  
 2010 *Bicornucythere bisanensis* (Okubo); Irizuki et al.: 16, fig. 4.10.
- 15 2011 *Bicornucythere bisanensis* (Okubo); Irizuki et al.: 42, fig. 4.9.  
 2011 *Bicornucythere bisanensis* (Okubo); Tanaka et al.: 84, fig. 6I.  
 2012a *Bicornucythere bisanensis* (Okubo); Tanaka et al.: 118, pl. 2, fig. 10.  
 2012b *Bicornucythere bisanensis* (Okubo); Tanaka et al.: 2, fig. 1c.  
 2012c *Bicornucythere bisanensis* (Okubo); Tanaka et al.: 9, fig. 4B.
- 20 2013 *Bicornucythere bisanensis* (Okubo); Kawano et al.: 96, fig. 5.2.  
 2014 *Bicornucythere bisanensis* (Okubo); Masuma and Yamada: 5, fig. 3.6.  
 2015a *Bicornucythere bisanensis* (Okubo); Irizuki et al.: 470, fig. 3.13.  
 2015b *Bicornucythere bisanensis* (Okubo); Irizuki et al.: 153, fig. 4.6.  
 2015 *Bicornucythere bisanensis* (Okubo); Yamada et al.: 56, fig. 3.2.
- 25 2015 *Bicornucythere bisanensis* (Okubo); Yasuhara et al.: 150, 152, figs. 84P-84S.; figs. 85K-85N.  
 2016 *Bicornucythere bisanensis* (Okubo); Li et al.: 1477, fig. 2.2.  
 2016 *Bicornucythere bisanensis* (Okubo); Matsushima et al.: 14, fig. 6B.  
 2017 *Bicornucythere bisanensis* s.l. (Okubo); Hong et al.: 58, fig. 8, 7.  
 2018 *Bicornucythere bisanensis* (Okubo); Irizuki et al.: 643, fig. 5.2.
- 30 non
- 1982 *Leguminocythereis? hodgii* (Brady); Hou et al.: pl. 76, figs. 17-19.  
 2008 *Keijella hodgii* (Brady); Hu and Tao: pl. 6, figs. 17; pl. 18, fig. 10.  
 2017 *Bicornucythere bisanensis* s.l. (Okubo); Hong et al.: 58, fig. 8, 8-10.

Genus *Cathacythere* Whatley and Zhao, 1987c  
*Cathacythere reticulata* Whatley and Zhao, 1987c  
Figure. 4 (10)

- 5  
1987c *Cathacythere reticulata* Whatley and Zhao: 2, 4.  
1988 *Sinocythere* sp.; Cai: pl. 1, fig. 7.  
?1999 Indet. gen. D sp.; Carbonel et al.: 127, pl. 3, figs. 3, 4.  
2007 *Cathacythere reticulata* Whatley and Zhao; Hou and Gou: pl. 175, figs. 1-5.  
10 2008 *Neosinocythere acupunctata* (Brady); Hu and Tao: pl. 213, figs. 13, 20.  
2008 *Neosinocythere chenwui* Hu and Tao: pl. 224, figs. 14-16.

Genus *Pistocythereis* Gou in Gou, Zheng and Huang, 1983  
*Pistocythereis bradyi* (Ishizaki, 1968)

- 15  
Figure. 4 (11)
- 1913 *Cythereis darwini* Brady; Kajiyama: pl. 1, figs. 67-69.  
1968 *Echinocythereis bradyiformis* Ishizaki: pl. 8, fig. 4.  
1968 *Echinocythereis bradyi* Ishizaki: pl. 9, fig. 17.  
20 1969 *Echinocythereis bradyiformis* (Ishizaki); Ishizaki: pl. 25, fig. 14.  
1971 *Echinocythereis bradyiformis* (Ishizaki); Ishizaki: pl. 4, fig. 1.  
1971 *Echinocythereis bradyi* (Ishizaki); Ishizaki: pl. 4, fig. 2.  
1975 *Pseudocythereis miaoliensis* Hu and Yang: 112, 113, pl. 1, figs. 12, 14, 17, 22, 23; pl. 2, fig. 9.  
1978 *Pseudocythereis miaoliensis* Hu and Yang; Hu and Yeh: pl. 1, figs. 15, 17, 18.  
25 1979 *Echinocythereis bradyiformis* (Ishizaki); Okubo: 152, figs. 5. 6. 7f-h.  
?1980b *Echinocythereis cribriformis* (Ishizaki); Wang et al.: pl. 10, fig. 22.  
?1980d *Echinocythereis cribriformis* (Ishizaki); Wang et al.: pl. 17, fig. 19.  
1981 *Echinocythereis? bradyi* (Ishizaki); Gou et al.: 179, pl. 86, figs. 3-5, 8.  
1982 *Pseudocythereis miaoliensis* Hu and Yang; Hu: pl. 2, fig. 28.  
30 1982 *Echinocythereis bradyi* (Ishizaki); Hou et al.: 382, pl. 84, figs. 1-6.  
1983 *Pistocythereis bradyi* (Ishizaki); Gou et al.: 95, fig. 31, pl. 5, fig. 1; pl. 16, figs. 1-12.  
1984 *Pistocythereis bradyi* (Ishizaki); Ishizaki: 42, pl. 1, fig. 2.  
1985 *Alococythere* [sic] *cribriformis* (Brady); Huang: 48, pl. 1, fig. 3.  
1985 *Wichmannella bradyi* (Ishizaki); Ikeya et al.: pl. 5, fig. 3.

- 1985 *Wichmannella bradyi* (Ishizaki); Nohara and Tabuki: pl. 2, fig. 16.
- 1986 *Wichmannella miaoliensis* (Hu and Yang): Hu, 131, pl. 7, figs. 3, 7.
- 1986 *Wichmannella miaoliensis* (Hu and Yang); Hu and Tao: 62, pl. 3, figs. 11, 12.
- 1986 *Wichmannella bradyi* (Ishizaki); Zhao et al.: pl. 1, fig. 15.
- 5 1986 *Pistocythereis bradyi* (Ishizaki); Zheng: pl. 3, figs. 14-19.
- 1987 *Pistocythereis bradyi* (Ishizaki); Zheng: 203, pl. 8, figs. 27, 28.
- 1987 *Wichmannella bradyi* (Ishizaki); Wang Q. and Zhang: 291, pl. 2, fig. 22.
- 1988 *Pistocythereis bradyi* (Ishizaki); Abe and Choe: 370, pl. 1, figs.1-4.
- 1988 *Wichmannella bradyi* (Ishizaki); Wang Q. et al.: 103, pl. 1, fig. 3.
- 10 1988 *Echinocythereis? bradyiformis* (Ishizaki); Wang et al.: 415, pl. 46, fig. 9.
- 1988 *Pistocythereis bradyi* (Ishizaki); Whatley and Zhao: 19, pl. 9, figs. 3-5.
- 1989 *Pistocythereis bradyiformis* (Ishizaki); Ruan: pl. 2, figs. 15-17.
- 1990 *Pistocythereis bradyi* (Ishizaki); Ishizaki: 214, fig. 1.5.
- 1990 *Pistocythereis bradyi* (Ishizaki); Tabuki and Nohara: 377, pl. 2, fig. 6.
- 15 ?1990 *Celtia japonica* (Ishizaki); Ruan: 134, pl. 2, fig. 11.
- ?1990 *Pistocythereis bisanensis* (Ishizaki); Takayasu et al.: 145, pl. fig. 7.
- 1991 *Pistocythereis bradyi* (Ishizaki); Cai: 111, pl. 4, fig. 2.
- 1992 *Pistocythereis bradyi* (Ishizaki); Mostafawi: 145, table 4, fig. 75.
- 1994 *Pistocythereis bradyi* (Ishizaki); Zheng: pl. 56, figs. 4-6.
- 20 1994 *Pistocythereis cribriformis* (Ishizaki); Zheng: pl. 56, figs. 7, 8.
- 1998 *Pistocythereis bradyiformis* (Ishizaki); Cao: pl. 8, figs. 8-13.
- 1998 *Pistocythereis bradyi* (Ishizaki); Cao: pl. 8, figs. 14-16.
- 1998 *Pistocythereis bradyi* (Ishizaki); Irizuki et al.: 8, fig. 3.6.
- 1998 *Pistocythereis bradyi* (Ishizaki); Yamane: 53, pl. 9, fig. 6.
- 25 1998 *Pistocythereis bradyi* (Ishizaki); Tanaka et al.: 91, pl. fig. 13.
- 1999 *Echinocythereis cribriformis* (Brady); Carbonel et al.: 135, pl. 7, fig. 1.
- 2000 *Pistocythereis bradyi* (Ishizaki); Gou: pl. 14, figs. 18, 19.
- 2000 *Pistocythereis bradyi* (Ishizaki); Irizuki and Hosoyama: 12, fig. 3.12.
- 2001b *Pistocythereis bradyi* (Ishizaki); Irizuki et al.: 109, fig. 3.12.
- 30 2001 *Pistocythereis bradyi* (Ishizaki); Kamiya et al.: 103, fig. 18.10.
- 2001 *Pistocythereis bradyi* (Ishizaki); Tabuki: 33, fig. 10.11.
- 2001 *Pistocythereis bradyi* (Ishizaki); Yasuhara and Irizuki: 89, pl. 9, figs. 11-16.
- 2003a *Pistocythereis bradyi* (Ishizaki); Irizuki et al.: 13, pl. 1, fig. 7.
- 2004 *Pistocythereis bradyi* (Ishizaki); Irizuki and Seto: 314, fig. 4.



- 2004 *Pistocythereis bradyi* (Ishizaki); Yasuhara et al.: 30-34, figs. 12-15.
- 2005 *Pistocythereis bradyi* (Ishizaki); Irizuki et al.: 42, fig. 4.5.
- 2005 *Pistocythereis bradyi* (Ishizaki); Ishida and Takayasu: 76, fig. 2.11.
- 2005 *Pistocythereis bradyi* (Ishizaki); Yasuhara et al.: 290, fig. 4.4.
- 5 2006 *Pistocythereis bradyi* (Ishizaki); Yasuhara and Seto: 107, fig. 5c.
- 2006 *Pistocythereis bradyi* (Ishizaki); Irizuki et al.: 24, fig. 7.6.
- 2007 *Pistocythereis bradyi* (Ishizaki); Hou and Gou: pl. 190, figs. 1-9.
- 2007 *Pistocythereis bradyi* (Ishizaki); Sasaki et al.: 524, fig. 5.22.
- 2008 *Pistocythereis binladengi* Hu and Tao: pl. 27, fig. 8.
- 10 2008 *Pistocythereis bradyiformis* (Ishizaki); Hu and Tao: pl. 162, figs. 15, 19, 21.
- 2008 *Pistocythereis fuchuui* Hu and Tao: pl. 179, fig. 1; pl. 187, figs. 1, 4, 5; pl. 223, fig. 15.
- 2008 *Pistocythereis jenho* Hu and Tao: pl. 162, fig. 4.
- 2008 *Pistocythereis yensongi* Hu and Tao: pl. 47, figs. 2, 3, 5, 6; pl. 84, figs. 9, 11, 14; pl. 94, figs. 12, 15, 17; pl. 105, fig. 13; pl. 140, figs. 1, 2, 4, 8.
- 15 2008 *Pistocythereis bradyi* (Ishizaki); Hu and Tao: pl. 47, fig. 8; pl. 94, figs. 8, 9, 13; pl. 95, figs. 3, 5; pl. 139, figs. 7, 8, 17, 20, 24, 26; pl. 162, figs. 2, 17, 18; pl. 163, figs. 1, 3, 4, 7, 8, 12; pl. 211, figs. 1, 14.
- ?2008 *Pistocythereis bradyi* (Ishizaki); Hu and Tao: pl. 10, figs. 5, 7, 9, 10, 13, 18; pl. 69, figs. 8, 18-21; pl. 94, fig. 14; pl. 116, figs. 8, 10, 11.
- 2008 *Pistocythereis bradyi* (Ishizaki); Irizuki et al.: 296, fig. 8.
- 20 2009 *Pistocythereis bradyi* (Ishizaki); Horikoshi et al.: fig. 5.11.
- 2009 *Pistocythereis bradyi* (Ishizaki); Ramlan and Noraswana: 17, pl. 3, figs. 1, 2.
- ?2009 *Pistocythereis* sp.; Ramlan and Noraswana: 17, pl. 3, figs. 3, 4.
- 2010 *Pistocythereis bradyi* (Ishizaki); Irizuki et al.: 16, fig. 4.9.
- 2010 *Pistocythereis bradyi* (Ishizaki); Ramlan and Noraswana: 202, pl. 1, figs. 4, 5.
- 25 2011 *Pistocythereis bradyi* (Ishizaki); Tanaka et al.: 84, fig. 6B.
- 2012a *Pistocythereis bradyi* (Ishizaki); Tanaka et al.: 118, pl. 2, fig. 11.
- 2012c *Pistocythereis bradyi* (Ishizaki); Tanaka et al.: 9, fig. 40.
- 2012d *Pistocythereis bradyi* (Ishizaki); Tanaka et al.: 29, pl. 3, fig. 12.
- 2013 *Pistocythereis bradyi* (Ishizaki); Kawano et al.: 96, fig. 5.12.
- 30 2015a *Pistocythereis bradyi* (Ishizaki); Irizuki et al.: 470, fig. 3.14.
- 2015 *Pistocythereis bradyi* (Ishizaki); Yamada et al.: 56, fig. 3.12.
- 2015 *Pistocythereis bradyi* (Ishizaki); Yasuhara et al.: 150, 152, figs. 84T-84W.; figs. 85O-85R.
- 2016 *Pistocythereis bradyi* (Ishizaki); Li et al.: 1477, figs. 2, 1a, 1b.
- 2016 *Pistocythereis bradyi* (Ishizaki); Matsushima et al.: 14, fig. 6H.

2017 *Pistocythereis bradyi* (Ishizaki); Tsukagoshi: 16, fig. 2E.

2018 *Pistocythereis bradyi* (Ishizaki); Irizuki et al.: 643, fig. 5.11.

non

5 ?1978 *Echinocythereis bradyi* (Ishizaki); Herrig: 83, text-fig. 3, pl. 1, figs. 1, 2.

2008 *Pistocythereis bradyi* (Ishizaki); Hu and Tao: pl. 21, figs. 1-3; pl. 27, figs. 2-6; pl. 38, fig. 6; pl. 47, figs. 9, 11, 15; pl. 55, fig. 19; pl. 84, figs. 17-20; pl. 95, figs. 1, 4; pl. 105, figs. 3, 5, 6, 8, 9-12, 14-17; pl. 149, figs. 1-3; pl. 162, fig. 5; pl. 187, figs. 2, 3, 6-11; pl. 199, figs. 1, 2; pl. 211, figs. 11, 12, 19.

10 Family Xestoleberididae Sars, 1928

Genus *Xestoleberis* Sars, 1866

*Xestoleberis hanaii* Ishizaki, 1968

PFigure. 4 (14)

15 1869 *Xestoleberis aurantia* (Baird); Brady: pl. 16, figs. 15, 16.

1961 *Xestoleberis* sp.; Hanai: 364, text-fig. 7. fig. 2a-c.

1968 *Xestoleberis hanaii* Ishizaki: pl. 9, figs. 1, 2.

1971 *Xestoleberis hanaii* Ishizaki; Ishizaki: pl. 4, fig. 14.

1974 *Xestoleberis hanaii* Ishizaki; Schornikov: 184-186, text-fig. 26.

20 1978 *Xestoleberis hanaii* Ishizaki; Guan in Hubei Institute of Geology and Science: 300, pl. 78, figs. 7-9.

1984 *Xestoleberis hanaii* Ishizaki; Okubo: 21, pl. 1, a-l.

1985 *Xestoleberis hanaii* Ishizaki; Ikeya et al.: pl. 8, figs. 16, 18, 22.

1985 *Xestoleberis hanaii* Ishizaki; Ishizaki and Matoba: pl. 6, fig. 6.

1986 *Xestoleberis* sp. Hu: 168, pl. 11, fig. 2.

25 ?1986 *Xestoleberis hanaii* Ishizaki; Zhao et al.: pl. 2, fig. 10.

1987 *Xestoleberis hanaii* Ishizaki; Wang Q. and Zhang: 290, pl. 1, fig. 8.

1987a *Xestoleberis hanaii* Ishizaki; Whatley and Zhao: 23, pl. 1, figs. 12, 13.

1988 *Xestoleberis hanaii* Ishizaki; Cai: pl. 2, 20.

1988 *Xestoleberis hanaii* Ishizaki; Ikeya and Shiozaki: 135, pl. 2, figs. 1a, 1b.

30 1988 *Xestoleberis hanaii* Ishizaki; Ruan and Hao: 371, pl. 68, figs. 19-22.

1988a *Xestoleberis hanaii* Ishizaki; Wang Q. et al.: 103, pl. 1, fig. 31.

?1988 *Xestoleberis hanaii* Ishizaki; Wang et al.: 422, pl. 54, fig. 16

1990 *Xestoleberis hanaii* Ishizaki; Lee: 348, pl. 34, figs. 10, 11.

1990 *Xestoleberis* cf. *hanaii* Ishizaki; Tabuki and Nohara: 377, pl. 2, fig. 13.

- 1991 *Xestoleberis hanaii* Ishizaki; Ikeya and Itoh: 145, fig. 24D.
- 1992 *Xestoleberis hanaii* Ishizaki; Mostafawi: 157, pl. 6, fig. 135.
- 1992 *Xestoleberis hanaii* Ishizaki; Ikeya and Suzuki: 137, pl. 9, fig. 6.
- 1993 *Xestoleberis hanaii* Ishizaki; Kamiya and Nakagawa: 133, pl. 6, fig. 11.
- 5 1994 *Xestoleberis hanaii* Ishizaki; Yumoto: 640, 642, 645, 647, figs. 1, 4-6.
- 1994 *Xestoleberis hanaii* Ishizaki; Zheng: pl. 60, fig. 14.
- 1998 *Xestoleberis hanaii* Ishizaki; Cao: pl. 10, figs. 12, 13.
- 1998 *Xestoleberis hanaii* Ishizaki; Irizuki et al.: 8, fig. 3.12.
- 2000 *Xestoleberis hanaii* Ishizaki; Ikeya and Kato: 151-153, 158, figs. 3-5, 10.
- 10 2001 *Xestoleberis hanaii* Ishizaki; Kamiya et al.: 93, fig. 13.17.
- 2001 *Xestoleberis hanaii* Ishizaki; Nakao et al.: 133, fig. 5.9.
- 2001 *Xestoleberis* cf. *hanaii* Ishizaki; Tabuki: 39, fig. 14.9.
- 2001 *Xestoleberis hanaii* Ishizaki; Yasuhara and Irizuki: 94, pl. 12, fig. 14.
- 2002 *Xestoleberis hanaii* Ishizaki; Irizuki et al.: 39, pl. 1, fig. 21.
- 15 2002 *Xestoleberis hanaii* Ishizaki; Tanaka: 27, fig. 2.2b.
- 2003 *Xestoleberis hanaii* Ishizaki; Yamaguchi: 135, 148, figs. 1M, 9O.
- 2004 *Xestoleberis hanaii* Ishizaki; Irizuki: 77, pl. 3, fig. 7.
- 2005 *Xestoleberis hanaii* Ishizaki; Ishida and Takayasu: 76, fig. 2.13.
- 2006 *Xestoleberis hanaii* Ishizaki; Irizuki et al.: 26, fig. 9.1.
- 20 2007 *Xestoleberis hanaii* Ishizaki; Hou and Gou: pl. 214, figs. 14-18; pl. 217, fig. 1.
- 2007 *Xestoleberis hanaii* Ishizaki; Sasaki et al.: 524, fig. 5.19.
- 2008 *Xestoleberis hanaii* Ishizaki; Hu and Tao: pl. 123, fig. 13.
- 2008 *Xestoleberis hanaii* Ishizaki; Yamada: 42, figs. 1D, 2.
- 2009 *Xestoleberis hanaii* Ishizaki; Ozawa: 238, fig. 4, 11.
- 25 2010 *Xestoleberis hanaii* Ishizaki; Ozawa: 34, pl. 4, fig. 21.
- 2010 *Xestoleberis hanaii* Ishizaki; Ozawa and Domitsu: 6, fig. 5.19.
- 2014 *Xestoleberis hanaii* Ishizaki; Masuma and Yamada: 6, fig. 4.23.
- 2014 *Xestoleberis hanaii* Ishizaki; Noraswana and Ramlan: 614, fig. 4.
- 2017 *Xestoleberis hanaii* Ishizaki; Tsukagoshi: 16, fig. 1E.
- 30 2017 *Xestoleberis hanaii* Ishizaki; Yamada: 1571-1575, figs. 1-6.

non

2008 *Xestoleberis hanaii* Ishizaki; Hu and Tao: pl. 152, fig. 11

## References

- Abe, K.: Population structure of *Keijella bisanensis* (Okubo) (Ostracoda, Crustacea) - an inquiry into how far the population structure will be preserved in the fossil record, *Journal of the Faculty of Science University of Tokyo Section II Geology Mineralogy Geography Geophysics*, 20, 443–488, 1983.
- 5 Abe, K.: Speciation completed? in *Keijella bisanensis* species group, in: *Evolutionary biology of Ostracoda: its fundamentals and applications*, edited by: Hanai, T. Ikeya, N. and Ishizaki, K., Kodansha, Tokyo, 919–925, 1988.
- Abe, K. and Choe, K.: Variation of *Pistocythereis* and *Keijella* species in Gamagyang Bay, south coast of Korea, in: *Evolutionary biology of Ostracoda: Its fundamentals and applications*, edited by: Hanai, T. Ikeya, N. and Ishizaki, K., Kodansha, Tokyo, 367–373, 1988.
- 10 Al-Abdul-Razzaq, S. K., Shublaq, W. and Al-Sheikh, Z.: Ostracode distribution and ecology of Sulaibikhat Bay, Kuwait, *Marine Geology*, 47, 57–75, 1982.
- Al-Jumaily, W. A. K. and Al-Sheikhly, S. S.: Palaeozoogeography of shallow marine Ostracoda from Holocene sediments- Southern Iraq, *Qatar University Science Journal*, 18, 215–230, 1999.
- Arul, B., Sridhar, S. G. D., Hussain, S. M., Darwin Felix, A. and Periakali, P.: Distribution of recent benthic Ostracoda from the sediments of Pitchavaram mangroves, Tamil Nadu, Southeast coast of India, *Bulletin of Pure and Applied Science*, 22, 55–73, 2003.
- 15 Baird, W.: *The Natural History of the British Entomostraca*, Ray Society, London, 364 pp., 1850.
- Baskar, K., Sridhar, S. G. D., Hussain, S. M., Solai, A. and Kalaivanan, R.: Distribution of Recent benthic ostracoda off Rameswaram, Palk Strait, Tamil Nadu, south east coast of India, *Special Publication of the Geological Society of India*, 20 195–212, 2013.
- Bate, R. H.: The distribution of recent ostracoda in the Abu Dhabi lagoon, Persian Gulf, in: *Paleoecologie des Ostracodes Colloque Pau (1970)*, edited by: Oertli, H. J., *Bulletin Centre Rech. Pau-SNPA, Pau.*, 239–256, 1971.
- Bold van den, W.A.: Miocene Ostracoda from Venezuela, *Journal of Paleontology*, 24, 76–88, 1950.
- Bold van den, W.A.: Oligo-Miocene Ostracoda from Southern Trinidad, *Micropaleontology*, 3, 231–254, 1957.
- 25 Brady, G. S.: On new or imperfectly known species of marine Ostracoda, *Transactions of the Zoological Society of London*, 5, 359–393, 1866.
- Brady, G. S.: Description of Ostracoda, in: *Les Fonds de la Mer. Part 1*, edited by: L. D. Folin and L. Périer, 155–159, 1869.
- Brady, G. S.: Report on the Ostracoda dredged by H.M.S. Challenger during the Years 1873-1876, in: *Report on the scientific results of the voyage of H.M.S. Challenger*, *Zoology*, 1, 1–184, 1880.
- 30 Cai, H.: Distribution of Ostracoda in the northeastern waters of the South China Sea, *Tropic Oceanology*, 1, 42–57, 1982 [in Chinese with English abstract].
- Cai, H.: Ostracoda in sediments from the north continental shelf of South China Sea, *Tropic Oceanology*, 7, 19–27, 1988 [in Chinese with English abstract].
- Cai, H.: Ostracoda from the Nansha Islands and the adjacent sea area, in: *Quaternary biological groups of the Nansha Islands and neighbouring waters*, edited by: Chen, Q., *Zhongshan University Publishing House, Zhongshan*, 82–128, 1991.
- 35 Cai, H. and Chen, M.: An approach to the distribution and environmental characteristics of microfaunas in surface sediments in the South China Sea, *Acta Micropalaeontologica Sinica*, 4, 73–86, 1987 [in Chinese with English abstract].

- Cao, M.: Ostracods from Quaternary Hang Hau Formation, Lei Yue Mun, HongKong, in: Fossils and strata of Hong Kong (Lower Volume), edited by: Li, Z. et al. Science Press, Beijing, 171–183, 1998 [in Chinese].
- Carbonel, P., Hoibian, T. and Moyes, J.: Ecosystemes et paleoenvironnements de la zone deltaïque de la Mahakam depuis la Fin du Neogene, Le Sondage Misedor, Editions Technip, Paris, 85–135, 1999 [in French].
- 5 Cheong, H.-K., Lee, E.-H., Paik, K.-H. and Chang, S.-K.: Recent ostracods from the southeastern slope of the Ulleung Basin, East Sea, Korea, *Journal of the Paleontological Society of Korea*, 2, 38–53, 1986.
- Coryell, H. N. and Fields, S.: A Gatun ostracode fauna from Cativa, Panama, *American Museum Novitates*, 956, 1–18, 1937.
- Dubovsky, N. W.: Materialy k Poznaniyu Fauny Ostracoda Chernogo Morya. *Trudy Karadagskoy Biologicheskoy Stantsii*, 5, 1–68, 1939.
- 10 Ebtesam, A. Y.: Distribution and taxonomy of shallow marine ostracods from the western coast of the Red Sea, Egypt. *Open Journal of Marine Science*, 8, 51–75, <https://doi.org/10.4236/ojms.2018.81004>, 2018.
- Elumalai, K., Hussain, S. M., Dhas, C. and Scott I.: Recent benthic Ostracoda from the sediments of Ennore Creek, Chennai, Tamil Nadu, India, *Journal of the Palaeontological Society of India*, 55, 11–22, 2010.
- Ganesan, P. and Hussain, S. M.: Distribution of Recent Benthic Ostracoda in Tamiraparani Estuary, Punnaikayal, near Tuticorin, Southeast Coast of India: Implications for Microenvironments, *Gondwana Geological Magazine*, 25, 103–114, 2010.
- 15 Gopalakrishna, K., Hussain, S. M., Maheshbilwa, L. and Ayisha, V. A.: Recent benthic Ostracoda from the inner-shelf off the Malabar Coast, Kerala, southwest coast of India, *Journal of the Palaeontological Society of India*, 52, 59–68, 2007.
- Gou, Y.: Recent Ostracoda from Hainan Island, South China Sea, *Courier Forschungsinstitut Senckenberg*, 123, 19–36, 20 1990.
- Gou, Y. Ostracoda, in: *Biota and Palaeoenvironment in northern Jiangsu, China since 10000a BP*, edited by: Gou, Y. and Tang, L., Science Press, Beijing. 50–60, 2000.
- Gou, Y. and Chen, D.: On the Occurrence of *Javanella* and *Saida* in the Pliocene of Leizhou Peninsula, Guangdong, China, in: *Evolutionary biology of Ostracoda: its fundamentals and applications*, edited by: Hanai, T. Ikeya, N. and Ishizaki, K., Kodansha, Tokyo, 797–803, 1988.
- 25 Gou, Y. and Gong, F.: Cenozoic Ostracoda from the continental shelf in East China Sea, *Cenozoic Mesozoic Palaeontology and Stratigraphy of East China*, 3, 109–124, 1989 [in Chinese with English abstract].
- Gou, Y., Chen, T., Guan, S., Jiang, Y., Liu, Z. Lai, X. Wu, O. and Chen, C.: Ostracoda. in: *Tertiary Palaeontological Atlas of North Continental Shelf of South China Sea*, edited by: Hou, Y., Science Technological Press, Beijing 138–187, 1981 [in 30 Chinese].
- Gou, Y., Zheng, S. and Huang, B.: Pliocene ostracode fauna of Leizhou Peninsula and northern Hainan Island, Guangdong Province, *Paleont. Sinica. newser. B*, 18, 1–134, 1983 [in Chinese, with English abstract].
- Hanai, T.: Studies on the Ostracoda from Japan. 1 - Subfamily Leptocytherinae, new subfamily, *Journal of the Faculty of Science, Tokyo University, Section 2*, 10, 431–468, 1957.
- 35 Hanai, T.: Studies on the Ostracoda from Japan. 4 - Family Cytherideidae, Sars, 1925, *Journal of the Faculty of Science, Tokyo University, Section 2*, 11, 291–308, 1959a.
- Hanai, T.: Studies on the Ostracoda from Japan. 5 - Subfamily Cytherinae Dana, 1852, *Journal of the Faculty of Science, Tokyo University, Section 2*, 11, 409–418, 1959b.
- Hanai, T.: Studies on the Ostracoda from Japan: Hingement, *Journal of the Faculty of Science, Tokyo University, Section 2*, 40 13, 345–377, 1961.

- Hanai, T.: Studies on the ostracod subfamily Schizocytherinae Mandelstam, *Journal of Paleontology*, 44, 693–729, 1970.
- Hanai, T.: A taxonomist's view on classification, *Developments in Palaeontology and Stratigraphy*, 11, 17–26, 1988.
- 5 Hartmann, G.: Zur Kenntnis des Eulitorals der afrikanischen Westküste zwischen Angola und Kap der Guten Hoffnung und der afrikanischen Ostküste von Suedafrika und Mocambique unter besonderer Berücksichtigung der Polychaeten und Ostracoden Teil 3: Die Ostracoden des Unte, edited by: Hartmann-Schroeder, G. and Hartmann, G., *Mitteilungen aus dem Hamburgischen Zoologischen Museum und Institut*, 69, 229–521, 1974 [in German].
- 10 Hartmann, G.: Zur Kenntnis des Eulitorals der australischen Küsten unter besonderer Berücksichtigung der Polychaeten und Ostracoden. Teil 1: Die Ostracoden der Ordnung Podocopida G. W. Müller, 1894 der tropisch-subtropischen Westküste Australiens (zwischen Derby und Perth, *Mitteilungen aus dem Hamburgischen Zoologischen Museum und Institut*, 75, 63–219, 1978 [in German with English abstract].
- Hartmann, G.: Die Ostracoden der Ordnung Podocopida G.W. MÜLLER, 1894 der warmtemperierten und subtropisch-tropischen Küstenabschnitte der Süd- und Südostküste Australiens. Teil 5: Zwischen Ceduna im Westen und Lake Entrance im Osten, *Mitteilungen aus dem Hamburgischen Zoologischen Museum und Institut*, 77, 111–204, 1980 [in German]
- 15 Hartmann, G.: Die Ostracoden der Ordnung Podocopida G. W. MÜLLER, 1894 der subtropisch-tropischen Ostküste Australiens. Teil 7: Zwischen Eden im Süden und Heron-Island im Norden, *Mitteilungen aus dem Hamburgischen Zoologischen Museum und Institut*, 78, 97–149, 1981 [in German with English abstract].
- Hartmann, G. and Puri, H. S.: Summary of neontological and paleontological classification of Ostracoda, *Mitteilungen aus dem Hamburgischen Zoologischen Museum und Institut*, 70, 7–73, 1974.
- 20 Helal, S. A. and Abdel Wahab, M.: Recent ostracods from marine sediments of Safaga Bay, Red Sea, Egypt, *Egypt Journal of Paleontology*, 4, 75–93, 2004.
- Herrig, E.: Ostracoden aus dem Plio-/Pleistozän der Sozialistischen Republik Vietnam. I, *Zeitschrift für geologische Wissenschaften*, 5, 1153–1167, 1977a [in German].
- 25 Herrig, E.: Ostracoden aus dem Plio-/Pleistozän der Sozialistischen Republik Vietnam. Teil II, *Zeitschrift für geologische Wissenschaften*, 5, 1253–1267, 1977b [in German].
- Herrig, E.: Ostracoden aus dem Plio-/Pleistozän der Sozialistischen Republik Vietnam. Teil III, *Zeitschrift für geologische Wissenschaften*, 6, 79–95, 1978 [in German].
- Hong, Y., Yasuhara, M., Iwatani, H., Seto, K., Yokoyama, Y., Yoshioka, K. and Mamo, B.: Freshwater reservoir construction by damming a marine inlet in Hong Kong: Paleocological evidence of local community change, *Marine Micropaleontology*, 53–59, <https://doi.org/10.1016/j.marmicro.2017.04.003>, 2017.
- 30 Horikoshi, H., Nakao, Y. and Endo, K.: Paleoenvironmental Changes Based on Ostracode Fossil Assemblages from the Latest Holocene Deposits in Misato City, Saitama Prefecture (Central Japan), *Proceedings of the Institute of Natural Sciences, Nihon University*, 44, 149–157, 2009 [in Japanese with English abstract].
- Hou, Y and Gou, Y.: Fossil Ostracoda of China. Volume 2: Cytheracea and Cytherellidae, Science Publishing House, Beijing, 2007 [in Chinese].
- 35 Hou, Y. and Zhao, Y.: Classification and significance of ornamentations and normal pores in Mesozoic and Cenozoic ostracods from China, *Acta Micropalaeontologica Sinica*, 3, 223–238, 1986 [in Chinese with English abstract].
- Hou, Y., Chen, T., Yang, H., Ho, J., Zhou, Q. and Tian, M.-Q.: Cretaceous-Quaternary ostracode fauna from Jiangsu, Geological Publishing House, Beijing, 1–386, 1982.

- Howe, H. V. and McKenzie, K. G.: Recent marine Ostracoda (Crustacea) from Darwin and north-Western Australia, Monograph Series of the Northern Territory, Museum of Arts and Sciences, 3, 1–50, 1989.
- Hu, C.: Studies on the Pliocene ostracodes from the Cholan Formation, Miaoli District, Taiwan, Proceedings of the Geological Society of China, 19, 25–51, 1976.
- 5 Hu, C.: Studies on Ostracodes from the Pleistocene Toukoshan formation in the Miaoli Area, Taiwan, Proceedings of the Geological Society of China, 20, 80–107, 1977a.
- Hu, C.: Studies on ostracodes from the Toukoshan Formation (Pleistocene), Miaoli district, Taiwan, Petroleum Geology of Taiwan, 14, 181–217, 1977b.
- Hu, C.: Ostracod faunas from the Pleistocene Liushuang Formation in the Taiwan Area, Taiwan, Proceedings of the Geological Society of China, 21, 151–162, 1978.
- 10 Hu, C.: Studies on ostracode faunas from the Hungchun Limestone, Hungchun Peninsula, Southern Taiwan, Petroleum Geology of Taiwan, 16, 59–84, 1979 [in Chinese with English abstract].
- Hu, C.: Studies on ostracod faunas from the Hengchun Limestone (Pleistocene), Southern Taiwan, Quaterly Journal of Taiwan Museum, 34, 61–93, 1981a.
- 15 Hu, C.: New ostracod faunas from the Maanshan Mudstone of Hengchun Peninsula, Southern Taiwan, Petroleum Geology of Taiwan, 18, 81–109, 1981b.
- Hu, C.: Studies on ostracod faunas from the Hengchun Limestone (Pleistocene), Hengchun area, southern Taiwan, Quaterly Journal of Taiwan Museum, 35, 171–195, 1982.
- Hu, C.: Ostracods from the Maanshan Mudstone, Hengchun Peninsula, Southern Taiwan, Petroleum Geology of Taiwan, 19, 149–178, 1983.
- 20 Hu, C.: New fossil ostracod faunas from Hengchun Peninsula, southern Taiwan, Journal of Taiwan Museum, 37, 65–129, 1984.
- Hu, C.: The ostracodes from the Tungshiao Formation (Pleistocene), west coast of Miaoli district, Taiwan, Journal of Taiwan Museum, 39, 99–173, 1986.
- 25 Hu, C. and Tao, H.: Fossil ostracods from the Fengshan Water Reservoir, Kaohsiung district, southern Taiwan, Acta Geologica Taiwanica, 24, 51–65, 1986.
- Hu, C. and Tao, H.: Studies on the ostracod fauna of Taiwan and its adjacent seas, National Taiwan Museum Special Publication Series. 13 (parts 1 and 2), 1–910pp., 2008.
- Hu, C. and Yang, L.: Studies on Pliocene ostracodes from the Chinshui Shale, Miaoli District, Taiwan, Proceedings of the Geological Society of China, 18, 103–114, 1975.
- 30 Hu, C. and Yeh, K.: Ostracod faunas from the Pleistocene Liushuang Formation in the Tainan area, Taiwan, Proceedings of the Geological Society of China, 21, 151–162, 1978.
- Huang, B.: Ostracoda from the column samples under surface deposits on the bottom of north Bohai Sea, Journal of Oceanography of Huanghai and Bohai Seas, 3, 42–53, 1985 [in Chinese with English abstract].
- 35 Hubei Institute of Geology and Science: Paleontological Atlas of Middle and Southern China (4)-Microfossils, Geological Publishing House, Beijing, 765, 1978 [in Chinese].

- Hussain, S. M.: Recent benthic Ostracoda from the Gulf of Mannar, off Tuticorin, south east coast of India, *Journal of the Palaeontological Society of India*, 43, 1–22, 1998.
- Hussain, S. M.: An Overview of Ostracoda Studies from the Freshwater, Marginal Marine and Marine Ecosystems of Andaman and Nicobar islands and the Coasts of India, in: *Micropaleontology and its Applications*, edited by: Kathal, P. K. Nigam, R. and Talib, A., Scientific Publishers, India, 135–162, 2017.
- 5 Hussain, S. M. and Mohan, S. P.: Recent Ostracoda from Adyar River estuary, Chennai, Tamil Nadu, *Journal of the Palaeontological Society of India*, 45, 25–31, 2000.
- Hussain, S. M., Krishnamurthy, R., Suresh Gandhi, M., Ilayaraja, K., Ganesan, P. and Mohan, S. P.: Micropalaeontological investigations on tsunamigenic sediments of Andaman Islands, *Current Science*, 91, 1655–1667, 2006.
- 10 Hussain, S. M., Elakkiya, P., Elumalai, K., Jonathan, M. P. and Nagarajan, R.: Evidences for Extreme Wave Events in Velanganni Coast, Southeast of India, *Boletín de la Sociedad Geológica Mexicana*, 65, 201–205, 2013a.
- Hussain, S. M., Kuleen, E. C., Jisha, K., Elumalai, K. and Ravi, G.: Distribution of benthic ostracoda in surface and subsurface backwater sediments of Ernakulam, Kerala, Southwest coast of India: Microenvironmental implications, *Special Publication of the Geological Society of India*, 213–224, 2013b.
- 15 Igo, H. and Ikeya, N.: Micro-organisms and fossils of the sea bottom, edited by Ota, J., Sakaguchi, H. and Norimoto, S., *Form of the organic world*, Kodansha, Tokyo, 186–209, 1971 [translated from Japanese].
- Ikeya, N. and Itoh, H.: Recent Ostracoda from the Sendai Bay region, Pacific coast of northwestern Japan, *Reports of the Faculty of Science Shizuoka University*, 25, 93–145, 1991.
- Ikeya, N. and Kato, M.: The life history and culturing of *Xestoleberis hanaii* (Crustacea, Ostracoda), *Hydrobiologia*, 419, 149–159, <https://doi.org/10.1023/A:1003931901501>, 2000.
- 20 Ikeya, N. and Shiozaki, M.: Holocene Ostracoda from the Denpukuji-ura site, Kurihama, Yokosuka City, *Miscellaneous Report of the Yokosuka City Museum*, 16, 131–140, 1988 [in Japanese].
- Ikeya, N. and Shiozaki, M.: Characteristics of the inner bay ostracodes around the Japanese islands: The use of ostracodes to reconstruct paleoenvironments, *The Memoirs of the Geological Society of Japan*, 39, 15–32, 1993 [in Japanese with English abstract].
- 25 Ikeya, N. and Suzuki, C.: Distributional patterns of modern ostracodes off Shimane Peninsula, southwestern Japan Sea, *Reports of the Faculty of Science Shizuoka University*, 26, 91–137, 1992.
- Ikeya, N., Okubo, I., Kitazato, H. and Ueda, H.: Shizuoka (Pleistocene and living Ostracoda, shallow marine, brackish and fresh-water), in: *Guidebook of Excursions for the 9th International Symposium on Ostracoda*, edited by: Organizing Committee 9th International Symposium on Ostracod, 1–32, 1985.
- 30 Imanishi, S.: On the Ostracoda, *Journal of Geoscience*, 7, 87–97, 1954 [in Japanese].
- Irizuki, T.: Fossil Ostracoda from the lower Pleistocene Masuda Formation, Tanega-shima Island, southern Japan, *Geoscience Reports of Shimane University*, 23, 65–77, 2004.
- Irizuki, T. and Hosoyama, M.: Fossil ostracodes (Crustacea) from the Pleistocene Noma Formation, Aichi Prefecture, central Japan, *The Bulletin of Aichi University of Education (Natural Science)*, 49, 9–15, 2000.
- 35 Irizuki, T. and Seto, K.: Temporal and spatial variations of paleoenvironments of Paleo-Hamana Bay, central Japan, during the Middle Pleistocene—Analyses of fossil ostracode assemblages, and total organic carbon, total nitrogen and total sulfur contents—, *Journal of the Geological Society of Japan*, 110, 309–324, 2004 [in Japanese with English abstract].
- Irizuki, T., Fujiwara, O., Fuse, K. and Masuda, F.: Paleoenvironmental changes during the last post glacial period on the western coast of the Miura Peninsula, Kanagawa Prefecture, central Japan: Fossil ostracode fauna and event deposits in bore hole cores, *Fossils*, 64, 1–22, 1998.
- 40



- Irizuki, T., Fujiwara, O. and Fuse, K.: Taphonomy of fossil ostracode assemblages in Holocene deposits on the Miura Peninsula, central Japan, *The Memoirs of the Geological Society of Japan*, 54, 66–116, 1999.
- 5 Irizuki, T., Yamaguchi, T., Takahashi, M. and Yanagisawa, Y.: Miocene temperate Ostracoda from the Tochigi and Fukushima districts, Central to Northeastern Japan, in: *Field Excursion Guidebook of the 14th International Symposium of Ostracoda*, edited by: The Organising Committee of ISO 2001, 45–72, 2001a.
- Irizuki, T., Masuda, F., Miyahara, B., Hirotsu, A., Ueda, S. and Yoshikawa, S.: Vertical changes of Holocene ostracodes in bore hole cores from off Kobe, related to the opening of straits and relative sea-level change in western Japan, *The Quaternary Research*, 40, 105–120, 2001b.
- 10 Irizuki, T., Kamiya, M. and Ueda, K.: Temporal and spatial distribution of fossil ostracode assemblages and sedimentary facies in the Middle Pleistocene Tahara Formation, Atsumi Peninsula, central Japan. *Geoscience Report of Shimane University*, 21, 31–39, 2002 [in Japanese with English abstract].
- Irizuki, T., Masuda, F. and Ikeya, N.: Sedimentary facies and fossil Ostracoda in the *Paleoloxodon naumanni* excavation site of the Middle Pleistocene Hamamatsu Formation, Sahama Town, Hamamatsu, Shizuoka Prefecture, central Japan, *Shizuoka Chigaku*, 87, 1–13, 2003a [in Japanese].
- 15 Irizuki, T., Nakamura, Y., Takayasu, K. and Sakai, S.: Faunal changes in Ostracoda (Crustacea) in Lake Nakaumi, southwest Japan, over the last 40 years, *Geoscience Report of Shimane University*, 22, 149–160, 2003b [in Japanese with English abstract].
- Irizuki, T., Matsubara, T. and Matsumoto, H.: Middle Pleistocene Ostracoda from the Takatsukayama member of the Meimi Formation, Hyogo prefecture, western Japan: significance of the occurrence of *Sinocytheridea impressa*, *Paleontological Research*, 9, 37–54, <http://dx.doi.org/10.2517/prpsj.9.37>, 2005.
- 20 Irizuki, T., Takata, T. and Ishida, K.: Recent Ostracoda from Urauchi Bay, Kamikoshiki-jima Island, Kagoshima Prefecture, southwestern Japan, *Laguna*, 13, 13–28, 2006.
- Irizuki, T., Seto, K. and Nomura, R.: The impact of fish farming and bank construction on Ostracoda in Uranouchi Bay on the Pacific coast of southwest Japan – Faunal changes between 1954 and 2002/2005, *Paleontological Research*, 12, 283–302, <http://dx.doi.org/10.2517/1342-8144-12.3.283>, 2008.
- 25 Irizuki, T., Gotomyo, A., Kawano, S., Yoshioka, K. and Nomura, R.: Relationships between Recent ostracode assemblage and environmental factors in the northern part of Harima-nada Bay off Aioi City, Hyogo Prefecture, Southwest Japan, *Geoscience reports of Shimane University*, 28, 1–9, 2009a.
- Irizuki, T., Taru, H., Taguchi, K. and Matsushima, Y.: Paleobiogeographical implications of inner bay Ostracoda during the Late Pleistocene Shimosueyoshi Transgression, central Japan, with significance of its migration and disappearance in eastern Asia, *Palaeogeography Palaeoclimatology Palaeoecology*, 271, 316–328, <https://doi.org/10.1016/j.palaeo.2008.11.002>, 2009b.
- 30 Irizuki, T., Ito, H., Yoshioka, K., Kawano, S., Nomura, R., Tanaka, Y. and Sako, M.: Recent ostracode assemblages and the marine environment around Kasado Bay in northeastern Suo-nada Bay, Yamaguchi Prefecture, Southwest Japan, *Geoscience Reports of Shimane University*, 19, 11–20, 2010 [in Japanese with English abstract].
- 35 Irizuki, T., Naya, T., Yamaguchi, M. and Mizuno, K.: Temporal changes in the paleoenvironment of the inner part of paleo-Tokyo Bay during the middle Pleistocene (MIS 11 and MIS 9): Analysis of fossil ostracode assemblages from the Shimosa Group in the Shobu core, Saitama Prefecture, Central Japan, *The Journal of the Geological Society of Japan*, 117, 35–52, 2011 [in Japanese with English abstract].

- Irizuki, T., Kobe, M., Ohkushi, K., Kawahata, H. and Kimoto, K.: Centennial- to millennial-scale change of Holocene shallow marine environments recorded in ostracode fauna, northeast Japan, *The Quaternary Research*, 84, 467–480, 2015a.
- 5 Irizuki, T., Ito, H., Sako, M., Yoshioka, K., Kawano, S., Nomura, R. and Tanaka, Y.: Anthropogenic impacts on meiobenthic Ostracoda (Crustacea) in the moderately polluted Kasado Bay, Seto Inland Sea, Japan, over the past 70 years, *Marine Pollution Bulletin*, 91, 149–159, <https://doi.org/10.1016/j.marpolbul.2014.12.013>, 2015b.
- Irizuki, T., Hirose, K., Ueda, Y., Fujihara, Y., Ishiga, H. and Seto, K.: Ecological shifts due to anthropogenic activities in the coastal seas of the Seto Inland Sea, Japan, since the 20th century, *Marine Pollution Bulletin*, 127, 637–653, <https://doi.org/10.1016/j.marpolbul.2017.12.050>, 2018.
- 10 Ishida, K. and Takayasu, K.: Ostracode assemblages of alluvium sediment cores in the western part of Izumo Plain, Shimane Prefecture, *Laguna*, 12, 73–79, 2005 [in Japanese with English abstract].
- Ishii, T., Kamiya, T. and Tsukagoshi, A.: Phylogeny and evolution of *Loxococoncha* (Ostracoda, Crustacea) species around Japan, *Hydrobiologia*, 538, 81–94, <https://doi.org/10.1007/s10750-004-4939-3>, 2005.
- 15 Ishizaki, K.: Miocene and Pliocene ostracodes from the Sendai area, Japan, *Science Reports of the Tohoku University, Sendai, Second Series (Geology)*, 37, 131–163, 1966.
- Ishizaki, K.: Ostracodes from Uranouchi Bay, Kochi Prefecture, Japan, *Science Reports of the Tohoku University, Sendai, Second Series (Geology)*, 40, 1–45, 1968.
- Ishizaki, K.: Ostracodes from Shinjiko and Nakanoumi, Shimane Prefecture, western Honshu, Japan, *Science Reports of the Tohoku University, Sendai, Second Series (Geology)*, 41, 197–224, 1969.
- 20 Ishizaki, K.: Ostracodes from Aomori Bay, Aomori Prefecture, Northeast Honshu, Japan, *Science Reports of the Tohoku University, Sendai, Second Series (Geology)*, 43, 59–97, 1971.
- Ishizaki, K.: Morphological variation in *Leguminocythereis hodgii* (Brady), Ostracoda (Crustacea), from Japan, Jun-ichi Iwai memorial volume, 697–711, 1972.
- Ishizaki, K.: Morphological variation in *Leguminocythereis? hodgii* (BRADY), Ostracoda (Crustacea) from Japan, *Bulletin of American Paleontology*, 65, 245–262, 1975.
- 25 Ishizaki, K.: Detailed survey on ostracodes in the drilling no. 56-9 core samples at the Kansai International Airport in Osaka Bay. Geological Survey of the submarine strata at the Kansai International Airport in Osaka Bay, Central Japan, 37–41, 1984.
- Ishizaki, K.: Sea level change in Mid-Pleistocene time and effects on Japanese ostracode faunas. *Bulletin of Marine Science*, 30 47, 213–220, 1990.
- Ishizaki, K. and Matoba, Y.: Akita (Early Pleistocene cold, shallow water Ostracoda). In: Guidebook of Excursions for the 9th International Symposium on Ostracoda, edited by: Organizing Committee 9th International Symposium on Ostracod, 1–12, 1985.
- Iwatani, H., Irizuki, T. and Goto, T.: Temporal changes of Plio-Pleistocene Ostracoda from the Takanabe Formation, 35 Miyazaki Group, Southwest Japan, *Fossils*, 15, 269–289, 2011.
- Iwatani, H. Young, Sansfica, M., Irizuki, T., Sampei, Y. and Ishiga, H.: Spatial variations in recent ostracode assemblages and bottom environments in Trincomalee Bay, northeast coast of Sri Lanka, *Micropaleontology*, 60, 509–518, 2014.

- Jain, S. P.: Recent Ostracoda from Mandvi Beach, west coast of India, Bulletin Indian Geologists' Association, 11, 89–139, 1978.
- Kaji T. and Tsukagoshi A.: Heterochrony and modularity in the degeneration of maxillopodan nauplius eyes, Biological Journal of the Linnean Society, 99, 521–529, <https://doi.org/10.1111/j.1095-8312.2009.01382.x>, 2010.
- 5 Kajiya, E.: On the Ostracoda of Misaki (part 3), Zoological Magazine (Doubutugaku-zassi), 25, 1–6, 1913 [in Japanese].
- Kamiya, T.: Morphological and ethological adaptations of Ostracoda to microhabitats in *Zostera* beds, in: Evolutionary biology of Ostracoda, its fundamentals and applications, edited by: Hanai, T. Ikeya, N. and Ishizaki, K., Kodansya, Tokyo, 303–318, 1988a.
- Kamiya, T.: Contrasting population ecology of two species of *Loxoconcha* (Ostracoda, Crustacea) in Recent *Zostera* (eelgrass) beds: Adaptive differences between phytal and bottom-dwelling species, Micropaleontology, 34, 316–331, 1988b.
- 10 Kamiya, T.: Different sex-ratios in two Recent species of *Loxoconcha* (Ostracoda), Senckenbergiana Lethaea, 68, 337–345, 1988c.
- Kamiya, T.: Differences between the sensory organs of phytal and bottom-dwelling *Loxoconcha* (Ostracoda, Crustacea), 15 Journal of Micropalaeomology, 8, 37–47, 1989a.
- Kamiya, T.: Functional morphology of Ostracoda in seagrass beds-with special reference to the copulatory behaviour, Japanese Journal of Benthology, 35/36, 75–88, 1989b [in Japanese with English abstract].
- Kamiya, T. and Hazel, J.: Shared versus derived characters in the pore-system of *Loxoconcha* (Ostracoda, Crustacea), Journal of Micropalaeomology, 11, 159–166, 1992.
- 20 Kamiya, T. and Nakagawa, T.: Ostracode fossil assemblages in the Holocene shell bed found in Takahama-Cho, Fukui Prefecture, Central Japan, Monograph of the Fukui City Museum of Natural History, 1, 115–133, 1993 [in Japanese].
- Kamiya, T., Ozawa, H and Kitamura, A.: Paleo-water mass structure during the deposition of middle part of the Omma Formation based on the change of ostracode assemblage, HGI Report, 5, 145–165, 1996 [in Japanese with English abstract].
- 25 Kamiya, T., Ozawa, H. and Obata, M.: Quaternary and recent marine Ostracoda in Hokuriku district, the Japan Sea coast, in: Guidebook of Excursions, 14th International Symposium on Ostracoda, edited by: The Organising Committee of ISO 2001, 73–106, 2001.
- Kamiyama, S., Nakao, Y. and Ozawa, H.: Ostracod fauna and its seasonal change in the tidal flat of the Tama River Estuary, Tokyo Bay, Central Japan, Proceedings of the Institute of Natural Sciences, Nihon University, 52, 119–134, 2017 [in 30 Japanese with English abstract].
- Kawano, S., Irizuki, T. and Nomura, R.: Temporal changes of Recent ostracode assemblages and bay environment with relation to the opening and extension of the Manzeki-seto Strait in the Tsushima Island southwest Japan, Earth Science, 67, 89–99, 2013 [in Japanese with English abstract].
- Keij, A. J.: Brief review of type species of genera from the Kingma collection, Proceedings of 7th International Symposium on Ostracodes, Beograd, 59–62, 1979.
- 35 Key, A. J.: Some Recent Ostracoda of Manila (Philippines), Proceedings, Koninklijke Nederlandse Akademie van Wetenschappen, Series B, 57, 351–363, 1954.

- Kingma, J. T.: Contributions to the knowledge of the young-Caenozoic Ostracoda from the Malayan region, University of Utrecht, 118pp, 1948.
- Kumar, V. and Hussain, S. M.: A report on Recent Ostracoda from Pitchavaram Mangroves, Tamil Nadu, *Geoscience Journal*, 18, 131–139, 1997.
- 5 Laboratory of Micropaleontology Department of Marine Geology, Tung-chi University: On the methods for the study of microfossils in Quaternary deposits and their application, *Papers on marine micropaleontology*, 172–191, 1980 [in Chinese with English abstract].
- Latreille, P. A.: Histoire naturelle, générale et particulière des Crustacés et des Insectes. *Histoires des Cypris et des Cytherées*, 8, 232–254, 1802.
- 10 Lee, E.: Pleistocene Ostracoda from the Marine Sedimentary Strata of the Cheju Island. Korea, Doctoral Thesis of the Department of Geology, Graduate School, Korea University, 1–400pp., 1990.
- Lee, E. and Paik, K.: Late Cenozoic ostracod fauna and paleoenvironments of the marine sedimentary strata in the Cheju Island, Korea, *Paleontological Society of Korea, Special Publication*, 1, 121–160, 1992.
- Li, S., Cui, X., Xu, H., Zhang, Z., Zhao, X., Cao, Z., Liu, Q. and Liu, X.: Distribution on characteristics of ostracods and evolution of the sedimentary environment of the Late Quaternary in the Laizhou Bay, Bohai Sea, *Quaternary Science*, 36, 1475–1488, 2016 [in Chinese with English abstract].
- 15 Maddocks, R. F.: Recent ostracodes of the Family Pontocyprididae chiefly from the Indian Ocean. *Smithsonian Contributions to Zoology*, 7, 1–56, 1969.
- Mahalakshmi, P. and Hussain, S. M.: Distribution of Ostracods from Pazhaverkadu (Pulicat Lagoon) Tamil Nadu, India, in: *Lakes and Wetlands* edited by: Vasudevan, S. Ramkumar, T. Singhal, R. K. Rajanikanth, A. and Ramesh, G., Partridge Publishing, India, 268–287, 2015.
- 20 Malz, H. and Ikeya, N.: Evidence for Japanese *Cythere omotenipponica* in Taiwan, *Senckenbergiana Biologica*, 63, 137–145, 1983.
- Masuma, T. and Yamada, K.: Recent ostracode distributions in Kumihama Bay (brackish lake) in the northern part of Kyoto Prefecture, central Japan, *Laguna*, 21. 1–14, 2014 [in Japanese with English abstract].
- 25 Matsushima, Y., Tanaka, G., Chiba, T., Kudo, Y., Kaneko, M., Ishikawa, H., Nomura, M., Sugihara, S. and Masubuchi, K.: Paleoenvironmental Change of the Hirakata-wan Inlet, West of Tokyo Bay, during the Jomon Transgression, *Bulletin of The Kanagawa Prefectural Museum Natural Science*, 45, 1–27, 2016 [in Japanese with English abstract].
- McKenzie, K. G.: Notes on the paradoxostomatids, in: *The Taxonomy, Morphology and Ecology of Recent Ostracoda*. Edited by: Neale, J W., Edinburgh, 48–67, 1969.
- 30 Mohammed, M. and Keyser, D.: Recent ostracods from the tidal flats of the coast of Aden City, Yemen, *Marine Biodiversity*, 42, 247–280, <https://doi.org/10.1007/s12526-012-0112-9>, 2012.
- Montenegro, M. E., Pugliese, N. and Sciuto, F.: Shallow water ostracods near the Mae Khlong river mouth (NW Gulf of Thailand), *Bollettino della Società Paleontologica Italiana*, 43, 225–234, 2004.
- 35 Morishita, T., Yamaguchi, T., Mashiba, H. and Kamiya, T.: A review of the utility of Mg/Ca and Sr/Ca ratios of ostracode valves as a tool for paleoenvironmental reconstructions, *Journal of the Geological Society of Japan*, 116, 523–543, <https://doi.org/10.5575/geosoc.116.523>, 2010.

- Mostafawi, N.: Rezente Ostracoden aus dem mittleren Sunda-Shelf, zwischen der Malaiischen Halbinsel und Borneo, Senckenbergiana Lethaea, 72, 129–168, 1992 [in German with English abstract].
- Mostafawi, N., Colin, J. P. and Babinot, J. F.: An account on the taxonomy of ostracodes from recent reefal flat deposits in Bali, Indonesia, Revue de Micropaléontologie, 48, 123–140, <https://doi.org/10.1016/j.revmic.2004.12.001>, 2005.
- 5 Müller, G. W.: Die Ostracoden des Golfes von Neapel und der angrenzenden Meeres-Abschnitte, Fauna und Flora des Golfes von Neapel, 21, 1–404, 1894.
- Müller, O. F.: Entomostraca seu Insecta Testacea, quae in aquis Daniae et Norvegiae reperit, descripsit et iconibus illustravit Otho Fridericus Müller. F.W. Thiele, Lipsiae & Havniae 1–134, 1785.
- 10 Nakao, Y. and Tsukagoshi, A.: Brackish-water Ostracoda (Crustacea) from the Obitsu River estuary, central Japan, Species Diversity, 7, 67–115, 2002.
- Nakao, Y. and Tsukagoshi, A.: Seasonal and decadal changes in distribution and abundance of Ostracoda (Crustacea) in the brackish-water environments, Proceedings of the Institute of Natural Sciences, Nihon University, 43, 249–275, 2008.
- 15 Nakao, Y., Tanaka, G. and Yamada, S.: Pleistocene and Living marine Ostracoda in Shizuoka district, Japan, in: Field Excursion Guidebook of the 14th International Symposium of Ostracoda, edited by The Organising Committee of ISO 2001, 127–147, 2001.
- Nakao, Y., Nakanishi, T. and Kimura, K.: Ostracode fossil assemblages from the Latest Pleistocene-Holocene deposits under the southern part of Nakagawa Lowland, Proceedings of the Institute of Natural Sciences, Nihon University, 43, 277–286, 2008 [in Japanese with English abstract].
- 20 Nohara, T. and Tabuki, R.: Okinawa Island (Plio-Pleistocene tropical and subtropical Ostracoda, and Ostracoda of recent coral reef), in: Guidebook of Excursions for the 9th International Symposium on Ostracoda, edited by: Organizing Committee 9th International Symposium on Ostracod, 1–15, 1985.
- Noraswana, N. F. and Ramlan, O.: Recent benthic ostracoda of Pahang River Delta, Pahang Darul Makmur, AIP Conference Proceedings, 1614, 610–615, 2014.
- 25 Noraswana, N. F., Ramlan, O. and Basir, J.: Distribution of Ostracods in Offshore Sediment around Pulau Tinggi, Johor, Sains Malaysiana, 36, 139–148, 2007.
- Okada, Y.: Development of cell arrangement in ostracod carapaces, Paleobiology, 7, 276–280, 1981.
- Okada, Y.: Structure and cuticle formation of the reticulated carapace of the ostracode *Bicornucythere bisanensis*, Lethaia, 15, 85–101, 1982.
- 30 Okubo, I.: Recent marine Ostracoda in the Inland Sea, Japan, I. *Callistocythere pumila* Hanai, 1957 and *Leguminocythereis bisanensis* sp. nov. in the Inland Sea, Japan (Ostracoda), Proceedings of the Japanese Society of Systematic Zoology, 11, 23–31, 1975.
- Okubo, I.: Recent marine Ostracoda in the Inland Sea, VIII. *Cushmanidea subjaponica* Hanai, 1959, in the Inland Sea, Japan, Research Bulletin of Shujitsu Junior College, Okayama, 7, 133–140, 1977.
- 35 Okubo, I.: Recent marine Ostracoda in the Inland Sea XIII. Six species of marine Ostracoda from the Inland Sea of Seto, Research Bulletin of Shujitsu Junior College, Okayama, 9, 143–157, 1979.
- Okubo, I.: Recent marine Ostracoda in the Inland Sea XVII. Taxonomic studies on recent marine podocopid Ostracoda from the Inland Sea of Seto, Publications of the Seto Marine Biological Laboratory, 25, 389–443, 1980.

- Okubo, I.: On the life history and size of *Xestoleberis hanaii*, Research Bulletin of Shujitsu Junior College, Okayama, 14, 19–43, 1984.
- Ozawa, H.: Ostracode fossils from the Late Pliocene to Early Pleistocene Omma Formation in the Hokuriku District, central Japan, Science Reports of Kanazawa University, 41, 77–115, 1996.
- 5 Ozawa, H.: Middle Pleistocene ostracods from the Naganuma Formation, Sagami Group, central Japan: Significance of the occurrence for the bay fauna along the Northwest Pacific margin, Paleontological Research, 13, 231–244, <http://dx.doi.org/10.2517/1342-8144-13.3.231>, 2009.
- Ozawa, H.: Preliminary report on the Middle Pleistocene ostracods from the Shichiba Formation on Sado Island in the eastern Japan Sea, Nihon-Kaiiki Kenkyu Kanazawa University, 41, 15–36, 2010.
- 10 Ozawa, H. and Kamiya, T.: Ecological analysis of benthic ostracods in the northern Japan Sea, based on water properties of modern habitats and late Cenozoic fossil records, Marine Micropaleontology, 55, 255–276, 2005
- Ozawa, H. and Domitsu, H.: Early Pleistocene ostracods from the Hamada Formation in the Shimokita Peninsula, northeastern Japan: The palaeobiogeographic significance of their occurrence for the shallow-water fauna, Paleontological Research, 14, 1–18, <http://dx.doi.org/10.2517/1342-8144-14.1.001>, 2010.
- 15 Ozawa, H., Kamiya, T. and Tsukagoshi, A.: Ostracode evidence for the paleoceanographic change of the Middle Pleistocene Jizodo and Yabu formations in the Boso Peninsula, central Japan, Science Reports of Kanazawa University, 40, 9–37, 1995.
- Paik, K.: Regionale Untersuchungen zur Verteilung der Ostracoden im Persischen Golf und im Golf von Oman, Meteor Forschungsergebnisse Reihe C Geologie und Geophysisch, 28, 37–76, 1977 [in German with English abstract].
- 20 Pokorny, V.: Contribution to the morphology and taxonomy of the subfamily Hemicytherinae Puri, 1953 (Crustacea, Ostracoda), Acta Universitatis Carolinae, Geologica, 1–35, 1955.
- Puri, H. S.: The Ostracode genus *Hemicythere* and its allies, Journal of the Washington Academy of Sciences, 43, 169–179, 1953.
- Ramlan, O. and Noraswana, N. F.: Distribution of ostracods in offshore sediment around Pulau Tioman, Pahang, Malaysian Applied Biology, 38, 11–19, 2009.
- 25 Ramlan, O. and Noraswana, N. F.: Distribution of Recent Ostracoda in Offshore Sediment Around Pulau Besar, Johor, Sains Malaysiana, 39, 199–207, 2010.
- Ruan, P.: Distribution of Recent Ostracoda in the littoral zone, Geoscience, 3, 377–389, 1989.
- Ruan, P.: Distribution of recent Ostracoda from the coastal zone of Gaode and Weizhou Island, Zhuang Autonomous Region of Guangxi. Acta Oceanologica Sinica, 9, 119–134, 1990.
- 30 Ruan, P. and Hao, Y.: Systematic description of microfossils. 2. Ostracoda. In: Quaternary Microbiotas in the Okinawa Trough and Their Geological Significance, edited by: Rong, L. and Shu, Z., Geological Publishing House, Beijing, 227–395, 1988 [in Chinese with English abstract].
- Ruggieri, G.: Eta e Faune di un Terrazzo Marino Sulla Costa Ionica Della Calabria. Giornale di Geologia, Annali del Museo Geologico di Bologna, Serie 2, 23, 19–168, 1953 [In Italian].
- 35 Sars, G. O.: Oversigt af Norges marine Ostracoder. Förhandlingar I Videnskabs-Selskabet i Christiania Forhandlingar, 1865, 1–130, 1866 [in Danish].
- Sars, G. O.: An account of the Crustacea of Norway with short descriptions and figures of all the species, Volume 9 (Ostracoda) (Parts 5–12), Bergen Museum, Bergen, 73–208, 1925.
- 40 Sars, G. O.: An account of the Crustacea of Norway with short descriptions and figures of all the species, Volume 9 (Ostracoda) (Parts 15–16), Bergen Museum, Bergen, 241–277, 1928.



- Sasaki, Y., Irizuki, T., Abe, K., Uchida, J. and Fujiwara, O.: Fossil ostracode assemblages from Holocene tsunami and normal bay deposits along the Tomoe River, Tateyama, Boso Peninsula, Central Japan, *The Quaternary Research*, 46, 517–532, 2007 [in Japanese with English abstract].
- Schneider, G. F.: Ostracodes from Quaternary deposits of North Vietnam, *Paleontologicheskii Zhurnal*, 1971, 259–262, 1971.
- 5 Schornikov, E. I.: On the study of Ostracoda (Crustacea) from the intertidal zone of the Kuril Islands, *Sbornik Rabot, Institut Biologii Morya, Dalnevostochnyy Nauchnyy Tsentr, Akademiya Nauk SSSR*, 1, 137–214, 1974 [in Russian with English abstract].
- Schornikov, E. I. and Shaytarov, S. V.: A new genus of ostracods from far-eastern seas, *Biologiya Morya*, 2, 41–47, 1979.
- 10 Schornikov E. I. and Zenina M. A.: Ostracods as indicators of conditions and dynamics of water ecosystems (on the example of Peter the Great Bay, Sea of Japan), *Dal'nauka, Vladivostok, Russia*, 333pp, 2014 [in Russian].
- Smith, R. and Kamiya, T.: The ontogeny of *Loxococoncha japonica* Ishizaki, 1968 (Cytheroidea, Ostracoda, Crustacea), *Hydrobiologia*, 490, 31–52, <https://doi.org/10.1023/A:1023464320403>, 2003.
- 15 Smith, R., Kamiya, T., Horne, D. and Tsukagoshi, A.: Evaluation of a new character for the phylogenetic analysis of Ostracoda (Crustacea): the podocopan maxillular branchial plate, *Zoologischer Anzeiger*, 243, 139–153, 2005.
- Sridhar, S. G. D., Hussain, S. M., Kumar, V. and Periakali, P.: Recent Ostracoda from Palk Bay, off Rameswaram, southeast coast of India, *Journal of Palaeontological Society of India*, 47, 17–39, 2002.
- Sylvester-Bradley, P. C.: Some ostracod genotypes, *Annals and Magazine of Natural History, Series 11*, 13, 192–199, 1947.
- Sylvester-Bradley, P. C.: The ostracode genus *Cythereis*, *Journal of Paleontology*, 22, 792–797, 1948.
- 20 Tabuki, R.: Plio-Pleistocene and Recent subtropical Ostracoda in Okinawa, in: *Field Excursion Guidebook of the 14<sup>th</sup> International Symposium of Ostracoda*, edited by: The Organising Committee of ISO 2001, 21–44, 2001.
- Tabuki, R. and Nakanishi, A.: Benthic ostracode fauna from Man-ko in the Southern Part of Okinawa Island, Japan, *Bulletin of Faculty of Education University of the Ryukyus*, 84, 253–264, 2014 [in Japanese with English abstract].
- 25 Tabuki, R. and Nohara, T.: The Ostracoda of the Sekisei-sho area, Ryukyu Islands, Japan: A preliminary report on the ostracods from the coral reefs in the Ryukyu Islands, in: *Ostracoda and global events*, edited by: Whatley, R. C. and Maybury, C., Chapman and Hall, 365–377, 1990.
- Takayasu, K., Ueda, K. and Ohta, H.: Natural history of the Nakano-umi and Shinji Lakes – XII. Ostracode thanatocoenoses from the bottom deposits of Lake Nakano-umi and their historical distribution, *Geological Reports of Shimane University*, 9, 129–144, 1990 [in Japanese].
- 30 Tanaka, G.: Two simple methods for observation of shapes in podocopid ostracod valves, *Journal of Fossil Research*, 35, 25–27, 2002.
- Tanaka, G. and Ikeya, N.: Migration and speciation of the *Loxococoncha japonica* species group (Ostracoda) in East Asia, *Paleontological Research*, 6, 265–284, 2002.
- 35 Tanaka, G. and Nomura, S.: Late Miocene and Pliocene Ostracoda from the Shimajiri Group, Kume-jima Island, Japan: Biogeographical significance of the timing of the formation of back-arc basin (Okinawa Trough), *Palaeogeography Palaeoclimatology Palaeoecology*, 276, 56–68, <http://dx.doi.org/10.1016/j.palaeo.2009.02.023>, 2009.
- Tanaka, G., Seto, K. and Takayasu, K.: The relationship between environments and ostracode assemblages from Miho Bay to Lake Shinji, *Laguna*, 5, 81–91, 1998[in Japanese with English abstract] .

- Tanaka, G., Tsukawaki, S. and Ooji, A.: Preliminary Report on Ostracods from the Miocene Sunagozaka Formation, Southern Part of Kanazawa City, Ishikawa Prefecture, Central Japan, Bulletin of the Japan Sea Research Institute Kanazawa University, 35, 53–64, 2004[in Japanese with English abstract].
- 5 Tanaka, G., Komatsu, T. and Phong, N. D.: Recent ostracod assemblages from the northeastern coast of Vietnam and the biogeographical significance of the euryhaline species, *Micropaleontology*, 55, 365–382, 2009.
- Tanaka, G., Komatsu, T., Saito, Y., Phong, N. D. and Lan V. Q.: Temporal changes in ostracod assemblages during the past 10,000 years associated with the evolution of the Red River delta system, northeastern Vietnam, *Marine micropaleontology*, 81, 77–87, <https://doi.org/10.1016/j.marmicro.2011.08.001>, 2011.
- 10 Tanaka G., Kaneko, M., Oishi M., Aoki, T. and Participants of 2011 SPP class in Ota Girls' High School.: Ostracods from the Holocene Numa Formation, Chiba Prefecture, central Japan, *Bulletin of the Gunma Museum of Natural History*, 16, 111–118, 2012a.
- Tanaka, G., Naruse, H., Yamashita, S. and Arai, K.: Ostracodes reveal the sea-bed origin of tsunami deposits, *Geophysical Research Letters*, 39, <https://doi.org/10.1029/2012GL051320>, 2012b.
- 15 Tanaka, G., Matsushima, Y. and Maeda, H.: Holocene Ostracods from the borehole core at Oppama Park, Yokosuka City, Kanagawa Prefecture, Central Japan: Paleoenvironmental analysis and the discovery of a fossil ostracod with three-dimensionally preserved soft parts, *Paleontological Research*, 16, 1–18, <https://dx.doi.org/10.2517/1342-8144-16.1.001>, 2012c.
- Tanaka, G., Zhou, B., Ikeya, N. and Hasegawa, Y.: Recent ostracod assemblages from Suruga Bay, Central Japan, *Bulletin of the Gunma Museum of Natural History*, 16, 1–30, 2012d.
- 20 Teeter, J. W.: Geographic distribution and dispersal of some Recent shallow-water marine Ostracoda, *The Ohio Journal of Science*, 73, 46–54, 1973.
- Tsukagoshi, A.: Studies on the living organisms for paleontology, part 2: Case studies for evolution and biodiversity of ostracods, *Fossils*, 102, 15–30, 2017 [in Japanese with English abstract].
- 25 Tsukagoshi, A. and Ikeya, N.: The ostracod genus *Cythere* O.F. Müller, 1785 and its species, *Transactions and Proceedings of the Palaeontological Society of Japan New Series*, 148, 197–222, 1987.
- Tsukagoshi, A. and Kamiya, T.: Heterochrony of the ostracod hingement and its significance for taxonomy, *Biological Journal of the Linnean Society*, 57, 343–370, 1996.
- 30 Wang, P. and Bian, Y.: Foraminifera and Ostracoda in bottom sediments of the Bohai Gulf and their bearing on Quaternary paleoenvironments, in: *Marine micropaleontology of China*, edited by: Wang, P., China Ocean Press, Beijing, 133–150, 1985.
- Wang, P. and Zhao, Q.: Ostracod distribution in bottom sediments of the East China Sea, in: *Marine micropalaeontology of China*, edited by: Wang, P., China Ocean Press, Beijing, 70–92, 1985.
- Wang, P., Lu, P. and Cheng, X.: Quantitative approaches to distribution of ostracod assemblages in the East China Sea, *Papers on marine micropaleontology*, 39–60, 1980a [in Chinese with English abstract].
- 35 Wang, P., Min, Q. and Bian, Y.: Distribution of Foraminifera and Ostracoda in bottom sediments of the northwestern part of the southern Yellow Sea and its geological significance, *Papers on marine micropalaeontology*, 61–83, 1980b [in Chinese with English abstract].
- Wang, P., Min, Q. and Gao, J.: A preliminary study of foraminiferal and ostracod assemblages of the Yellow Sea, *Papers on marine micropalaeontology*, 85–100, 1980c [in Chinese with English abstract].



- Wang, P., Xia, L. and Zheng, F.: A preliminary note on the Late Quaternary microfauna of the Gulf of Tonkin and its bearing on the sea-level changes, *Papers on marine micropaleontology*, 140–145, 1980d [in Chinese with English abstract]
- 5 Wang, P., Min, Q. and Bian, Y.: Distribution of Foraminifera and Ostracoda in bottom sediments of the northwestern part of the south Huanghai (Yellow) Sea and its geological significance, in: *Marine micropaleontology of China*, edited by: Wang, P., China Ocean Press, Beijing, 93–114, 1985
- Wang, P., Zhang, L., Zhao, Q., Min, Q., Bian, Y., Zheng, L., Cheng, X. and Chen, R.: Foraminifera and Ostracoda in bottom sediments of the East China Sea, Beijing, 1–438, 1988 [in Chinese]
- 10 Wang, Q. and Zhang, L.: Holocene ostracod fauna and paleoenvironment in the sea region around Hongkong, *Acta Oceanologica Sinica*, 6, 281–291, 1987.
- Wang, Q., Li, V., Tian, G. and Fang, L.: Quaternary marine ostracoda on the west coast of the Bohai Sea, *Acta Oceanologica Sinica*, 7, 94–103, 1988. Warne, M., Whatley, R. and Blagden, B.: Ostracoda from Lee Point on Shoal Bay, Northern Australia: Part 3, Podocopina (Cytheracea), *Revista Española de Micropaleontología*, 38, 103–167, 2006.
- 15 Whatley, R. C. and Keeler, N.: Ostracodes actuels de l'Île de la Reunion (Sud-Ouest de l'Océan Indien), *Revue de Micropaléontologie*, 3, 63–84, 1989 [in French with English abstract].
- Whatley, R. C. and Zhao, Q.: A revision of Brady's 1869 study of the Ostracoda of Hong Kong, *Journal of Micropalaeontology*, 6, 21–29, 1987a.
- Whatley, R. C. and Zhao, Q.: Recent Ostracoda of the Malacca Straits. Part 1. *Revista Espanola de Micropaleontologia*, 19, 327–366, 1987b.
- 20 Whatley, R. C. and Zhao, Q.: On *Cathacythere reticulata* Whatley and Zhao gen. et sp. nov., *Stereo-Atlas of Ostracod Shells*, 14, 1–4, 1987c.
- Whatley, R. C. and Zhao, Q.: Recent Ostracoda of the Malacca Straits. Part 2. (Continuation), *Revista Espanola de Micropaleontologia*, 20, 5–37, 1988.
- 25 Witte, L.: Taxonomy and biogeography of West African beach ostracods, *Verhandelingen der Koninklijke Nederlandse Akademie van Wetenschappen Afdeling Natuurkunde Eerste Reeks*, 39, 84pp, 1993.
- Yajima, M.: Late Pleistocene Ostracoda from the Boso Peninsula, central Japan, *Bulletin of the University Museum, University of Tokyo*, 20, 141–227, 1982.
- Yajima, M.: Preliminary notes on the Japanese Miocene Ostracoda. In: *Evolutionary Biology of Ostracoda: Its Fundamentals and Applications* edited by: Hanai, T., Ikeya, N. and Ishizaki, K, Kodansha, Tokyo, 1073–1085, 1988.
- 30 Yajima, M. and Lord, A.: The interpretation of Quaternary environments using Ostracoda: an example from Japan, *Proceedings of the Geologists' Association*, 101, 153–161, 1990.
- Yamada, K., Terakura, M. and Tsukawaki, S.: The impact on bottom sediments and ostracods in the Khlong Thom River mouth following the 2004 Indian Ocean tsunami, *Paleontological Research*, 18, 104–117, <http://dx.doi.org/10.2517/2014PR011>, 2014.
- 35 Yamada, K., Masuma, T. and Seto, K.: Paleoenvironmental changes in Lake Nakaumi during the last 1,700 years on the basis of ostracode assemblages, *The Quaternary Research*, 54, 53–68, <https://doi.org/10.4116/jaqua.54.53>, 2015.
- Yamada, S.: Review of studies on structure and cuticle formation of ostracod carapace, *Fossils*, 83, 41–58, 2008 [in Japanese with English abstract].

- Yamada, S.: Formation and function of the “Xestoleberis-spot” in *Xestoleberis hanaii* (Crustacea: Ostracoda), *Journal of Morphology*, 278, 1570–1576, <https://doi.org/10.1002/jmor.20731>, 2017.
- Yamaguchi, S.: Morphological evolution of cytherocopine ostracods inferred from 18s ribosomal DNA sequences, *Journal of Crustacean Biology*, 23, 131–153, 2003.
- 5 Yamaguchi, T., Mashiba, H. and Kamiya, T.: Miocene ostracodes from the Osaki Formation, Kukinaga Group, Tanegashima, Southwest Japan, and their significance for the biogeography of the Indo-West Pacific, *Paleontological Research*, 16, 107–123, <https://dx.doi.org/10.2517/1342-8144-16.2.107>, 2012
- Yamane, K.: Recent ostracode assemblages from Hiuchi-nada Bay, Seto Inland Sea of Japan, *Bulletin of Ehime Prefecture Science Museum*, 3, 19–59, 1998 [in Japanese with English abstract].
- 10 Yassini, I. and Jones, B. G.: Recent Foraminifera and Ostracoda from estuarine and shelf environments on the southeastern coast of Australia. University of Wollongong Press, Wollongong, NSW, 484pp, 1995.
- Yassini, I., Jones, B. G. and Jones, M. R.: Ostracods from the Gulf of Carpentaria, northeastern Australia, *Senckenbergiana Lethaea*, 73, 375–406, 1993.
- 15 Yasuhara, M., Hunt, G., Okahashi, H. and Brandão, S. N.: Taxonomy of deep-sea trachyleberidid, thaerocytherid, and hemicytherid genera (Ostracoda), *Smithsonian Contributions to Paleobiology*, 96, 1–216, 2015.
- Yasuhara, M. and Irizuki, T.: Recent Ostracoda from the northeastern part of Osaka Bay, southwestern Japan, *Journal of Geosciences, Osaka City University*, 44, 57–95, 2001.
- Yasuhara, M. and Seto, K.: Holocene relative sea-level change in Hiroshima Bay, Japan: A semi-quantitative reconstruction based on ostracodes, *Paleontological Research*, 10, 99–106, <http://dx.doi.org/10.2517/prpsj.10.99>, 2006.
- 20 Yasuhara, M., Irizuki, T. and Yoshikawa, S.: Changes in Holocene ostracode faunas and depositional environments in the Kitan Strait, southwestern Japan, *Paleontological Research*, 6, 85–99, 2002a.
- Yasuhara, M., Irizuki, T., Yoshikawa, S. and Narayama, F.: Holocene sea-level changes in Osaka Bay, western Japan: Ostracode evidence in a drilling core from the southern Osaka Plain, *Journal of the Geological Society of Japan*, 108, 633–643, [https://doi.org/10.5575/geosoc.108.10\\_633](https://doi.org/10.5575/geosoc.108.10_633), 2002b.
- 25 Yasuhara, M., Yamazaki, H., Irizuki, T. and Yoshikawa, S.: Temporal changes of ostracode assemblages and anthropogenic pollution during the last 100 years, in sediment cores from Hiroshima Bay, Japan, *The Holocene*, 13, 527–536, 2003.
- Yasuhara, M., Irizuki, T., Yoshikawa, S., Nanayama, F. and Mitamura, M.: Holocene ostracode paleobiogeography in Osaka Bay, southwestern Japan, *Marine Micropaleontology*, 53, 11–36, <https://doi.org/10.1016/j.marmicro.2004.02.002>, 2004.
- 30 Yasuhara, M., Yoshikawa, S. and Nanayama, F.: Reconstruction of the Holocene seismic history of a seabed fault using relative sea-level curves reconstructed by ostracode assemblages: Case study on the Median Tectonic Line in Iyo-nada Bay, western Japan, *Palaeogeography, Palaeoclimatology, Palaeoecology*, 222, 285–312, <https://doi.org/10.1016/j.palaeo.2005.03.019>, 2005.
- Yumoto, M.: The shell structure of the carapace in *Xestoleberis hanaii* Ishizaki (Crustacea, Ostracoda), *Transactions and Proceedings of the Palaeontological Society of Japan New Series*, 176, 638–649, 1994.
- 35 Zhao, Q.: Recent Ostracoda from the coast zone of the East China Sea and the Yellow Sea, *Marine Geology and Quaternary Geology*, 4, 45–55, 1984 [in Chinese with English abstract].
- Zhao, Q. Distribution of recent Ostracoda from the coast zone of the East China Sea and the Yellow Sea, *Acta Oceanologica Sinica*, 7, 193–204, 1985 [in Chinese].

- Zhao, Q. and Wang, P.: Modern Ostracoda in Shelf Seas off China: Zoogeographical Zonation, *Oceanologia et Limnologia Sinica*, 21, 458–464, 1990 [in Chinese with English abstract].
- Zhao, Q. and Whatley, R.: Distribution of Ostracod Assemblages In Bottom Sediments of the Malacca Straits Area, *Journal of Tongji University, Shanghai*, 16, 159–168, 1988 [in Chinese with English abstract].
- 5 Zhao, Q. and Whatley, R. C.: Recent podocopid Ostracoda of the Sedili River and Jason Bay, southeastern Malay Peninsula, *Micropaleontology*, 35, 168–187, 1989.
- Zhao, Q., Wang, P. and Zhang, Q.: Ostracoda in bottom sediments of the South China Sea off Guangdong Province, China: Their taxonomy and distribution, in: *Marine micropalaeontology of China*, edited by: Wang P., 196–217, 1985.
- Zhao, Q., Wang, P. and Zhang, Q.: Distribution of Ostracoda in the north part of the South China Sea Shelf, *Acta Oceanologica Sinica*, 8, 590–602, 1986 [in Chinese].
- 10 Zhao, Q., Jian, Z., Zhang, Z., Cheng, X., Wang, K. and Zheng, H.: Holocene benthic Foraminifera and Ostracoda from the shelf mud area of the East China Sea and their paleoenvironmental implications, *Acta Micropalaeontologica Sinica*, 26, 117–128, 2009.
- Zheng, S.: Quaternary ostracods from Zhejiang Province, *Acta Micropalaeontologica Sinica*, 3, 429–434, 1986 [in Chinese with English abstract].
- 15 Zheng, S.: Quaternary Ostracoda fauna from coastal deposits along the coast of Fujian, *Memoirs of Nanjing Institute of Geology and Palaeontology*, 23, 187–220, 1987 [in Chinese with English abstract].
- Zheng, Z.: A comprehensive ecological and palaeoecological study of the sedimentary organisms in the northern and eastern areas of the South China Sea, Hubei Science and Technical Press, Beijing, 175pp, 1994 [in Chinese with English abstract].
- 20
